# Supplementary material for: Integrated analysis and identification of hub genes as novel biomarkers for Alzheimer’s disease
Source: PubMed Central journal article supplement (PMC9468260; doi:10.3389/fnagi.2022.901972), 2022-08-30
Supplement: Data_Sheet_1.pdf [file Data_Sheet_1.pdf]

GSE28146

| Accession | Title          | Source name                                                                          | Sex    | Age           | Disease status |
|-----------|----------------|--------------------------------------------------------------------------------------|--------|---------------|----------------|
| GSM697308 | Control 976    | laser capture CA1 tissue gray matter from formalin fixed, paraffin embedded specimen | Male   | 85 years old  | Control        |
| GSM697309 | Control 1003   | laser capture CA1 tissue gray matter from formalin fixed, paraffin embedded specimen | Male   | 80 years old  | Control        |
| GSM697310 | Control 1008   | laser capture CA1 tissue gray matter from formalin fixed, paraffin embedded specimen | Female | 92 years old  | Control        |
| GSM697311 | Control 1012   | laser capture CA1 tissue gray matter from formalin fixed, paraffin embedded specimen | Male   | 80 years old  | Control        |
| GSM697312 | Control 1015   | laser capture CA1 tissue gray matter from formalin fixed, paraffin embedded specimen | Male   | 75 years old  | Control        |
| GSM697313 | Control 1018   | laser capture CA1 tissue gray matter from formalin fixed, paraffin embedded specimen | Female | 97 years old  | Control        |
| GSM697314 | Control 1030   | laser capture CA1 tissue gray matter from formalin fixed, paraffin embedded specimen | Male   | 95 years old  | Control        |
| GSM697315 | Control 1040   | laser capture CA1 tissue gray matter from formalin fixed, paraffin embedded specimen | Male   | 87 years old  | Control        |
| GSM697316 | Incipient 715  | laser capture CA1 tissue gray matter from formalin fixed, paraffin embedded specimen | Female | 101 years old | Incipient      |
| GSM697317 | Incipient 720  | laser capture CA1 tissue gray matter from formalin fixed, paraffin embedded specimen | Female | 95 years old  | Incipient      |
| GSM697318 | Incipient 994  | laser capture CA1 tissue gray matter from formalin fixed, paraffin embedded specimen | Female | 83 years old  | Incipient      |
| GSM697319 | Incipient 1019 | laser capture CA1 tissue gray matter from formalin fixed, paraffin embedded specimen | Male   | 88 years old  | Incipient      |
| GSM697320 | Incipient 1029 | laser capture CA1 tissue gray matter from formalin fixed, paraffin embedded specimen | Female | 91 years old  | Incipient      |
| GSM697321 | Incipient 1034 | laser capture CA1 tissue gray matter from formalin fixed, paraffin embedded specimen | Male   | 88 years old  | Incipient      |
| GSM697322 | Incipient 1043 | laser capture CA1 tissue gray matter from formalin fixed, paraffin embedded specimen | Female | 97 years old  | Incipient      |
| GSM697323 | Moderate 826   | laser capture CA1 tissue gray matter from formalin fixed, paraffin embedded specimen | Female | 85 years old  | Moderate       |
| GSM697324 | Moderate 832   | laser capture CA1 tissue gray matter from formalin fixed, paraffin embedded specimen | Female | 89 years old  | Moderate       |
| GSM697325 | Moderate 856   | laser capture CA1 tissue gray matter from formalin fixed, paraffin embedded specimen | Female | 83 years old  | Moderate       |
| GSM697326 | Moderate 965   | laser capture CA1 tissue gray matter from formalin fixed, paraffin embedded specimen | Female | 82 years old  | Moderate       |
| GSM697327 | Moderate 1020  | laser capture CA1 tissue gray matter from formalin fixed, paraffin embedded specimen | Female | 79 years old  | Moderate       |
| GSM697328 | Moderate 1025  | laser capture CA1 tissue gray matter from formalin fixed, paraffin embedded specimen | Male   | 81 years old  | Moderate       |
| GSM697329 | Moderate 1031  | laser capture CA1 tissue gray matter from formalin fixed, paraffin embedded specimen | Female | 86 years old  | Moderate       |
| GSM697330 | Moderate 1037  | laser capture CA1 tissue gray matter from formalin fixed, paraffin embedded specimen | Male   | 82 years old  | Moderate       |
| GSM697331 | Severe 701     | laser capture CA1 tissue gray matter from formalin fixed, paraffin embedded specimen | Male   | 85 years old  | Severe         |
| GSM697332 | Severe 723     | laser capture CA1 tissue gray matter from formalin fixed, paraffin embedded specimen | Female | 65 years old  | Severe         |
| GSM697333 | Severe 807     | laser capture CA1 tissue gray matter from formalin fixed, paraffin embedded specimen | Male   | 93 years old  | Severe         |
| GSM697334 | Severe 819     | laser capture CA1 tissue gray matter from formalin fixed, paraffin embedded specimen | Female | 79 years old  | Severe         |
| GSM697335 | Severe 867     | laser capture CA1 tissue gray matter from formalin fixed, paraffin embedded specimen | Female | 94 years old  | Severe         |
| GSM697336 | Severe 872     | laser capture CA1 tissue gray matter from formalin fixed, paraffin embedded specimen | Female | 79 years old  | Severe         |
| GSM697337 | Severe 1036    | laser capture CA1 tissue gray matter from formalin fixed, paraffin embedded specimen | Female | 93 years old  | Severe         |

GSE48350

| Accession | Title                                     | Source name                                     | Individual | Brain region           | Gender | Characteristics | Braak stage | Apoe genotype | Mmse |
|-----------|-------------------------------------------|-------------------------------------------------|------------|------------------------|--------|-----------------|-------------|---------------|------|
| GSM300166 | PostcentralGyrus_female_91yrs_indiv10     | brain, postcentral gyrus, female, 91 years      | 10, C      | postcentral gyrus      | female | age (yrs): 91   |             |               |      |
| GSM300167 | SuperiorFrontalGyrus_female_91yrs_indiv10 | brain, superior frontal gyrus, female, 91 years | 10, C      | superior frontal gyrus | female | age (yrs): 91   |             |               |      |
| GSM300168 | Hippocampus_female_96yrs_indiv105         | brain, hippocampus, female, 96 years            | 105, C     | hippocampus            | female | age (yrs): 96   |             |               |      |
| GSM300169 | Hippocampus_male_82yrs_indiv106           | brain, hippocampus, male, 82 years              | 106, C     | hippocampus            | male   | age (yrs): 82   |             |               |      |
| GSM300170 | Hippocampus_male_84yrs_indiv108           | brain, hippocampus, male, 84 years              | 108, C     | hippocampus            | male   | age (yrs): 84   |             |               |      |
| GSM300171 | Hippocampus_female_87yrs_indiv109         | brain, hippocampus, female, 87 years            | 109, C     | hippocampus            | female | age (yrs): 87   |             |               |      |
| GSM300172 | Hippocampus_female_82yrs_indiv111         | brain, hippocampus, female, 82 years            | 111, C     | hippocampus            | female | age (yrs): 82   |             |               |      |
| GSM300173 | EntorhinalCortex_male_45yrs_indiv12       | brain, entorhinal cortex, male, 45 years        | 12, AA     | entorhinal cortex      | male   | age (yrs): 45   |             |               |      |
| GSM300174 | Hippocampus_male_45yrs_indiv12            | brain, hippocampus, male, 45 years              | 12, AA     | hippocampus            | male   | age (yrs): 45   |             |               |      |
| GSM300175 | PostcentralGyrus_male_45yrs_indiv12       | brain, postcentral gyrus, male, 45 years        | 12, AA     | postcentral gyrus      | male   | age (yrs): 45   |             |               |      |
| GSM300176 | SuperiorFrontalGyrus_male_45yrs_indiv12   | brain, superior frontal gyrus, male, 45 years   | 12, AA     | superior frontal gyrus | male   | age (yrs): 45   |             |               |      |
| GSM300177 | EntorhinalCortex_male_95yrs_indiv14       | brain, entorhinal cortex, male, 95 years        | 14, C      | entorhinal cortex      | male   | age (yrs): 95   |             |               |      |
| GSM300178 | Hippocampus_male_95yrs_indiv14            | brain, hippocampus, male, 95 years              | 14, C      | hippocampus            | male   | age (yrs): 95   |             |               |      |
| GSM300179 | PostcentralGyrus_male_95yrs_indiv14       | brain, postcentral gyrus, male, 95 years        | 14, C      | postcentral gyrus      | male   | age (yrs): 95   |             |               |      |
| GSM300180 | SuperiorFrontalGyrus_male_95yrs_indiv14   | brain, superior frontal gyrus, male, 95 years   | 14, C      | superior frontal gyrus | male   | age (yrs): 95   |             |               |      |
| GSM300181 | EntorhinalCortex_male_80yrs_indiv15       | brain, entorhinal cortex, male, 80 years        | 15, C      | entorhinal cortex      | male   | age (yrs): 80   |             |               |      |
| GSM300182 | Hippocampus_male_80yrs_indiv15            | brain, hippocampus, male, 80 years              | 15, C      | hippocampus            | male   | age (yrs): 80   |             |               |      |
| GSM300183 | PostcentralGyrus_male_80yrs_indiv15       | brain, postcentral gyrus, male, 80 years        | 15, C      | postcentral gyrus      | male   | age (yrs): 80   |             |               |      |
| GSM300185 | Hippocampus_male_91yrs_indiv16-07         | brain, hippocampus, male, 91 years              | 16-07, C   | hippocampus            | male   | age (yrs): 91   |             |               |      |
| GSM300186 | EntorhinalCortex_female_45yrs_indiv17     | brain, entorhinal cortex, female, 45 years      | 17, C      | entorhinal cortex      | female | age (yrs): 45   |             |               |      |
| GSM300187 | Hippocampus_female_45yrs_indiv17          | brain, hippocampus, female, 45 years            | 17, C      | hippocampus            | female | age (yrs): 45   |             |               |      |
| GSM300188 | SuperiorFrontalGyrus_female_45yrs_indiv17 | brain, superior frontal gyrus, female, 45 years | 17, C      | superior frontal gyrus | female | age (yrs): 45   |             |               |      |
| GSM300189 | EntorhinalCortex_female_74yrs_indiv18     | brain, entorhinal cortex, female, 74 years      | 18, C      | entorhinal cortex      | female | age (yrs): 74   |             |               |      |
| GSM300190 | Hippocampus_female_74yrs_indiv18          | brain, hippocampus, female, 74 years            | 18, C      | hippocampus            | female | age (yrs): 74   |             |               |      |
| GSM300191 | SuperiorFrontalGyrus_female_74yrs_indiv18 | brain, superior frontal gyrus, female, 74 years | 18, C      | superior frontal gyrus | female | age (yrs): 74   |             |               |      |
| GSM300192 | EntorhinalCortex_female_99yrs_indiv2      | brain, entorhinal cortex, female, 99 years      | 2, C       | entorhinal cortex      | female | age (yrs): 99   |             |               |      |
| GSM300193 | Hippocampus_female_99yrs_indiv2           | brain, hippocampus, female, 99 years            | 2, C       | hippocampus            | female | age (yrs): 99   |             |               |      |
| GSM300194 | PostcentralGyrus_female_99yrs_indiv2      | brain, postcentral gyrus, female, 99 years      | 2, C       | postcentral gyrus      | female | age (yrs): 99   |             |               |      |
| GSM300195 | SuperiorFrontalGyrus_female_99yrs_indiv2  | brain, superior frontal gyrus, female, 99 years | 2, C       | superior frontal gyrus | female | age (yrs): 99   |             |               |      |
| GSM300196 | EntorhinalCortex_female_74yrs_indiv21     | brain, entorhinal cortex, female, 74 years      | 21, C      | entorhinal cortex      | female | age (yrs): 74   |             |               |      |
| GSM300197 | Hippocampus_female_74yrs_indiv21          | brain, hippocampus, female, 74 years            | 21, C      | hippocampus            | female | age (yrs): 74   |             |               |      |
| GSM300198 | PostcentralGyrus_female_74yrs_indiv21     | brain, postcentral gyrus, female, 74 years      | 21, C      | postcentral gyrus      | female | age (yrs): 74   |             |               |      |
| GSM300199 | SuperiorFrontalGyrus_female_74yrs_indiv21 | brain, superior frontal gyrus, female, 74 years | 21, C      | superior frontal gyrus | female | age (yrs): 74   |             |               |      |
| GSM300200 | PostcentralGyrus_female_92yrs_indiv26     | brain, postcentral gyrus, female, 92 years      | 26, C      | postcentral gyrus      | female | age (yrs): 92   |             |               |      |
| GSM300201 | SuperiorFrontalGyrus_female_92yrs_indiv26 | brain, superior frontal gyrus, female, 92 years | 26, C      | superior frontal gyrus | female | age (yrs): 92   |             |               |      |
| GSM300202 | PostcentralGyrus_female_91yrs_indiv27     | brain, postcentral gyrus, female, 91 years      | 27, C      | postcentral gyrus      | female | age (yrs): 91   |             |               |      |
| GSM300203 | SuperiorFrontalGyrus_female_91yrs_indiv27 | brain, superior frontal gyrus, female, 91 years | 27, C      | superior frontal gyrus | female | age (yrs): 91   |             |               |      |
| GSM300204 | EntorhinalCortex_male_83yrs_indiv28       | brain, entorhinal cortex, male, 83 years        | 28, C      | entorhinal cortex      | male   | age (yrs): 83   |             |               |      |
| GSM300205 | Hippocampus_male_83yrs_indiv28            | brain, hippocampus, male, 83 years              | 28, C      | hippocampus            | male   | age (yrs): 83   |             |               |      |
| GSM300206 | PostcentralGyrus_male_83yrs_indiv28       | brain, postcentral gyrus, male, 83 years        | 28, C      | postcentral gyrus      | male   | age (yrs): 83   |             |               |      |
| GSM300207 | SuperiorFrontalGyrus_male_83yrs_indiv28   | brain, superior frontal gyrus, male, 83 years   | 28, C      | superior frontal gyrus | male   | age (yrs): 83   |             |               |      |
| GSM300208 | EntorhinalCortex_male_28yrs_indiv29       | brain, entorhinal cortex, male, 28 years        | 29, C      | entorhinal cortex      | male   | age (yrs): 28   |             |               |      |
| GSM300209 | Hippocampus_male_28yrs_indiv29            | brain, hippocampus, male, 28 years              | 29, C      | hippocampus            | male   | age (yrs): 28   |             |               |      |
| GSM300210 | PostcentralGyrus_male_28yrs_indiv29       | brain, postcentral gyrus, male, 28 years        | 29, C      | postcentral gyrus      | male   | age (yrs): 28   |             |               |      |
| GSM300211 | SuperiorFrontalGyrus_male_28yrs_indiv29   | brain, superior frontal gyrus, male, 28 years   | 29, C      | superior frontal gyrus | male   | age (yrs): 28   |             |               |      |
| GSM300212 | PostcentralGyrus_female_74yrs_indiv30     | brain, postcentral gyrus, female, 74 years      | 30, C      | postcentral gyrus      | female | age (yrs): 74   |             |               |      |
| GSM300213 | SuperiorFrontalGyrus_female_74yrs_indiv30 | brain, superior frontal gyrus, female, 74 years | 30, C      | superior frontal gyrus | female | age (yrs): 74   |             |               |      |
| GSM300214 | EntorhinalCortex_male_97yrs_indiv34       | brain, entorhinal cortex, male, 97 years        | 34, C      | entorhinal cortex      | male   | age (yrs): 97   |             |               |      |
| GSM300215 | Hippocampus_male_97yrs_indiv34            | brain, hippocampus, male, 97 years              | 34, C      | hippocampus            | male   | age (yrs): 97   |             |               |      |
| GSM300216 | PostcentralGyrus_male_97yrs_indiv34       | brain, postcentral gyrus, male, 97 years        | 34, C      | postcentral gyrus      | male   | age (yrs): 97   |             |               |      |
| GSM300217 | SuperiorFrontalGyrus_male_97yrs_indiv34   | brain, superior frontal gyrus, male, 97 years   | 34, C      | superior frontal gyrus | male   | age (yrs): 97   |             |               |      |
| GSM300218 | EntorhinalCortex_female_34yrs_indiv35     | brain, entorhinal cortex, female, 34 years      | 35, AA     | entorhinal cortex      | female | age (yrs): 34   |             |               |      |
| GSM300219 | Hippocampus_female_34yrs_indiv35          | brain, hippocampus, female, 34 years            | 35, AA     | hippocampus            | female | age (yrs): 34   |             |               |      |
| GSM300220 | PostcentralGyrus_female_34yrs_indiv35     | brain, postcentral gyrus, female, 34 years      | 35, AA     | postcentral gyrus      | female | age (yrs): 34   |             |               |      |
| GSM300221 | SuperiorFrontalGyrus_female_34yrs_indiv35 | brain, superior frontal gyrus, female, 34 years | 35, AA     | superior frontal gyrus | female | age (yrs): 34   |             |               |      |
| GSM300222 | EntorhinalCortex_female_74yrs_indiv38     | brain, entorhinal cortex, female, 74 years      | 38, C      | entorhinal cortex      | female | age (yrs): 74   |             |               |      |
| GSM300223 | Hippocampus_female_74yrs_indiv38          | brain, hippocampus, female, 74 years            | 38, C      | hippocampus            | female | age (yrs): 74   |             |               |      |
| GSM300224 | PostcentralGyrus_female_74yrs_indiv38     | brain, postcentral gyrus, female, 74 years      | 38, C      | postcentral gyrus      | female | age (yrs): 74   |             |               |      |

|           |                                           |                                                 |          |                        |        |               |
|-----------|-------------------------------------------|-------------------------------------------------|----------|------------------------|--------|---------------|
| GSM300225 | SuperiorFrontalGyrus_female_74yrs_indiv38 | brain, superior frontal gyrus, female, 74 years | 38, C    | superior frontal gyrus | female | age (yrs): 74 |
| GSM300226 | PostcentralGyrus_female_90yrs_indiv40     | brain, postcentral gyrus, female, 90 years      | 40, C    | postcentral gyrus      | female | age (yrs): 90 |
| GSM300227 | Hippocampus_female_91yrs_indiv40-04       | brain, hippocampus, female, 91 years            | 40-04, C | hippocampus            | female | age (yrs): 91 |
| GSM300228 | EntorhinalCortex_female_44yrs_indiv42     | brain, entorhinal cortex, female, 44 years      | 42, C    | entorhinal cortex      | female | age (yrs): 44 |
| GSM300229 | SuperiorFrontalGyrus_female_44yrs_indiv42 | brain, superior frontal gyrus, female, 44 years | 42, C    | superior frontal gyrus | female | age (yrs): 44 |
| GSM300230 | EntorhinalCortex_female_37yrs_indiv45     | brain, entorhinal cortex, female, 37 years      | 45, C    | entorhinal cortex      | female | age (yrs): 37 |
| GSM300231 | Hippocampus_female_37yrs_indiv45          | brain, hippocampus, female, 37 years            | 45, C    | hippocampus            | female | age (yrs): 37 |
| GSM300232 | PostcentralGyrus_female_37yrs_indiv45     | brain, postcentral gyrus, female, 37 years      | 45, C    | postcentral gyrus      | female | age (yrs): 37 |
| GSM300233 | SuperiorFrontalGyrus_female_37yrs_indiv45 | brain, superior frontal gyrus, female, 37 years | 45, C    | superior frontal gyrus | female | age (yrs): 37 |
| GSM300234 | EntorhinalCortex_male_85yrs_indiv46       | brain, entorhinal cortex, male, 85 years        | 46, C    | entorhinal cortex      | male   | age (yrs): 85 |
| GSM300235 | Hippocampus_male_85yrs_indiv46            | brain, hippocampus, male, 85 years              | 46, C    | hippocampus            | male   | age (yrs): 85 |
| GSM300236 | PostcentralGyrus_male_85yrs_indiv46       | brain, postcentral gyrus, male, 85 years        | 46, C    | postcentral gyrus      | male   | age (yrs): 85 |
| GSM300237 | SuperiorFrontalGyrus_male_85yrs_indiv46   | brain, superior frontal gyrus, male, 85 years   | 46, C    | superior frontal gyrus | male   | age (yrs): 85 |
| GSM300238 | EntorhinalCortex_female_70yrs_indiv47     | brain, entorhinal cortex, female, 70 years      | 47, C    | entorhinal cortex      | female | age (yrs): 70 |
| GSM300239 | Hippocampus_female_70yrs_indiv47          | brain, hippocampus, female, 70 years            | 47, C    | hippocampus            | female | age (yrs): 70 |
| GSM300240 | PostcentralGyrus_female_70yrs_indiv47     | brain, postcentral gyrus, female, 70 years      | 47, C    | postcentral gyrus      | female | age (yrs): 70 |
| GSM300241 | SuperiorFrontalGyrus_female_70yrs_indiv47 | brain, superior frontal gyrus, female, 70 years | 47, C    | superior frontal gyrus | female | age (yrs): 70 |
| GSM300242 | EntorhinalCortex_female_64yrs_indiv52     | brain, entorhinal cortex, female, 64 years      | 52, C    | entorhinal cortex      | female | age (yrs): 64 |
| GSM300243 | Hippocampus_female_64yrs_indiv52          | brain, hippocampus, female, 64 years            | 52, C    | hippocampus            | female | age (yrs): 64 |
| GSM300244 | PostcentralGyrus_female_64yrs_indiv52     | brain, postcentral gyrus, female, 64 years      | 52, C    | postcentral gyrus      | female | age (yrs): 64 |
| GSM300245 | SuperiorFrontalGyrus_female_64yrs_indiv52 | brain, superior frontal gyrus, female, 64 years | 52, C    | superior frontal gyrus | female | age (yrs): 64 |
| GSM300246 | PostcentralGyrus_male_70yrs_indiv53       | brain, postcentral gyrus, male, 70 years        | 53, C    | postcentral gyrus      | male   | age (yrs): 70 |
| GSM300247 | SuperiorFrontalGyrus_male_70yrs_indiv53   | brain, superior frontal gyrus, male, 70 years   | 53, C    | superior frontal gyrus | male   | age (yrs): 70 |
| GSM300248 | EntorhinalCortex_female_85yrs_indiv54     | brain, entorhinal cortex, female, 85 years      | 54, C    | entorhinal cortex      | female | age (yrs): 85 |
| GSM300249 | PostcentralGyrus_female_85yrs_indiv54     | brain, postcentral gyrus, female, 85 years      | 54, C    | postcentral gyrus      | female | age (yrs): 85 |
| GSM300250 | SuperiorFrontalGyrus_female_85yrs_indiv54 | brain, superior frontal gyrus, female, 85 years | 54, C    | superior frontal gyrus | female | age (yrs): 85 |
| GSM300251 | SuperiorFrontalGyrus_female_91yrs_indiv59 | brain, superior frontal gyrus, female, 91 years | 59, C    | superior frontal gyrus | female | age (yrs): 91 |
| GSM300252 | EntorhinalCortex_male_21yrs_indiv66       | brain, entorhinal cortex, male, 21 years        | 66, C    | entorhinal cortex      | male   | age (yrs): 21 |
| GSM300253 | PostcentralGyrus_male_21yrs_indiv66       | brain, postcentral gyrus, male, 21 years        | 66, C    | postcentral gyrus      | male   | age (yrs): 21 |
| GSM300254 | SuperiorFrontalGyrus_male_21yrs_indiv66   | brain, superior frontal gyrus, male, 21 years   | 66, C    | superior frontal gyrus | male   | age (yrs): 21 |
| GSM300255 | Hippocampus_male_69yrs_indiv67            | brain, hippocampus, male, 69 years              | 67, C    | hippocampus            | male   | age (yrs): 69 |
| GSM300256 | PostcentralGyrus_male_69yrs_indiv67       | brain, postcentral gyrus, male, 69 years        | 67, C    | postcentral gyrus      | male   | age (yrs): 69 |
| GSM300258 | EntorhinalCortex_male_40yrs_indiv68       | brain, entorhinal cortex, male, 40 years        | 68, C    | entorhinal cortex      | male   | age (yrs): 40 |
| GSM300259 | PostcentralGyrus_male_40yrs_indiv68       | brain, postcentral gyrus, male, 40 years        | 68, C    | postcentral gyrus      | male   | age (yrs): 40 |
| GSM300260 | SuperiorFrontalGyrus_male_40yrs_indiv68   | brain, superior frontal gyrus, male, 40 years   | 68, C    | superior frontal gyrus | male   | age (yrs): 40 |
| GSM300261 | EntorhinalCortex_male_52yrs_indiv71       | brain, entorhinal cortex, male, 52 years        | 71, C    | entorhinal cortex      | male   | age (yrs): 52 |
| GSM300262 | Hippocampus_male_52yrs_indiv71            | brain, hippocampus, male, 52 years              | 71, C    | hippocampus            | male   | age (yrs): 52 |
| GSM300263 | PostcentralGyrus_male_52yrs_indiv71       | brain, postcentral gyrus, male, 52 years        | 71, C    | postcentral gyrus      | male   | age (yrs): 52 |
| GSM300264 | SuperiorFrontalGyrus_male_52yrs_indiv71   | brain, superior frontal gyrus, male, 52 years   | 71, C    | superior frontal gyrus | male   | age (yrs): 52 |
| GSM300265 | PostcentralGyrus_male_75yrs_indiv72       | brain, postcentral gyrus, male, 75 years        | 72, C    | postcentral gyrus      | male   | age (yrs): 75 |
| GSM300266 | SuperiorFrontalGyrus_male_75yrs_indiv72   | brain, superior frontal gyrus, male, 75 years   | 72, C    | superior frontal gyrus | male   | age (yrs): 75 |
| GSM300267 | EntorhinalCortex_male_86yrs_indiv73       | brain, entorhinal cortex, male, 86 years        | 73, C    | entorhinal cortex      | male   | age (yrs): 86 |
| GSM300268 | Hippocampus_male_86yrs_indiv73            | brain, hippocampus, male, 86 years              | 73, C    | hippocampus            | male   | age (yrs): 86 |
| GSM300269 | PostcentralGyrus_male_86yrs_indiv73       | brain, postcentral gyrus, male, 86 years        | 73, C    | postcentral gyrus      | male   | age (yrs): 86 |
| GSM300270 | SuperiorFrontalGyrus_male_86yrs_indiv73   | brain, superior frontal gyrus, male, 86 years   | 73, C    | superior frontal gyrus | male   | age (yrs): 86 |
| GSM300271 | EntorhinalCortex_female_26yrs_indiv76     | brain, entorhinal cortex, female, 26 years      | 76, C    | entorhinal cortex      | female | age (yrs): 26 |
| GSM300272 | Hippocampus_female_26yrs_indiv76          | brain, hippocampus, female, 26 years            | 76, C    | hippocampus            | female | age (yrs): 26 |
| GSM300273 | PostcentralGyrus_female_26yrs_indiv76     | brain, postcentral gyrus, female, 26 years      | 76, C    | postcentral gyrus      | female | age (yrs): 26 |
| GSM300274 | SuperiorFrontalGyrus_female_26yrs_indiv76 | brain, superior frontal gyrus, female, 26 years | 76, C    | superior frontal gyrus | female | age (yrs): 26 |
| GSM300275 | EntorhinalCortex_male_20yrs_indiv77       | brain, entorhinal cortex, male, 20 years        | 77, C    | entorhinal cortex      | male   | age (yrs): 20 |
| GSM300276 | Hippocampus_male_20yrs_indiv77            | brain, hippocampus, male, 20 years              | 77, C    | hippocampus            | male   | age (yrs): 20 |
| GSM300277 | PostcentralGyrus_male_20yrs_indiv77       | brain, postcentral gyrus, male, 20 years        | 77, C    | postcentral gyrus      | male   | age (yrs): 20 |
| GSM300278 | SuperiorFrontalGyrus_male_20yrs_indiv77   | brain, superior frontal gyrus, male, 20 years   | 77, C    | superior frontal gyrus | male   | age (yrs): 20 |
| GSM300279 | EntorhinalCortex_male_20yrs_indiv78       | brain, entorhinal cortex, male, 20 years        | 78, C    | entorhinal cortex      | male   | age (yrs): 20 |
| GSM300280 | Hippocampus_male_20yrs_indiv78            | brain, hippocampus, male, 20 years              | 78, C    | hippocampus            | male   | age (yrs): 20 |
| GSM300281 | PostcentralGyrus_male_20yrs_indiv78       | brain, postcentral gyrus, male, 20 years        | 78, C    | postcentral gyrus      | male   | age (yrs): 20 |
| GSM300282 | SuperiorFrontalGyrus_male_20yrs_indiv78   | brain, superior frontal gyrus, male, 20 years   | 78, C    | superior frontal gyrus | male   | age (yrs): 20 |
| GSM300283 | PostcentralGyrus_female_36yrs_indiv79     | brain, postcentral gyrus, female, 36 years      | 79, AA   | postcentral gyrus      | female | age (yrs): 36 |
| GSM300284 | SuperiorFrontalGyrus_female_36yrs_indiv79 | brain, superior frontal gyrus, female, 36 years | 79, AA   | superior frontal gyrus | female | age (yrs): 36 |
| GSM300285 | EntorhinalCortex_male_69yrs_indiv8        | brain, entorhinal cortex, male, 69 years        | 8, C     | entorhinal cortex      | male   | age (yrs): 69 |
| GSM300286 | Hippocampus_male_69yrs_indiv8             | brain, hippocampus, male, 69 years              | 8, C     | hippocampus            | male   | age (yrs): 69 |

|            |                                           |                                                 |        |                        |        |               |     |     |         |
|------------|-------------------------------------------|-------------------------------------------------|--------|------------------------|--------|---------------|-----|-----|---------|
| GSM300287  | PostcentralGyrus_male_69yrs_indiv8        | brain, postcentral gyrus, male, 69 years        | 8, C   | postcentral gyrus      | male   | age (yrs): 69 |     |     |         |
| GSM300288  | SuperiorFrontalGyrus_male_69yrs_indiv8    | brain, superior frontal gyrus, male, 69 years   | 8, C   | superior frontal gyrus | male   | age (yrs): 69 |     |     |         |
| GSM300289  | EntorhinalCortex_female_44yrs_indiv80     | brain, entorhinal cortex, female, 44 years      | 80, AA | entorhinal cortex      | female | age (yrs): 44 |     |     |         |
| GSM300290  | Hippocampus_female_44yrs_indiv80          | brain, hippocampus, female, 44 years            | 80, AA | hippocampus            | female | age (yrs): 44 |     |     |         |
| GSM300291  | PostcentralGyrus_female_44yrs_indiv80     | brain, postcentral gyrus, female, 44 years      | 80, AA | postcentral gyrus      | female | age (yrs): 44 |     |     |         |
| GSM300292  | SuperiorFrontalGyrus_female_44yrs_indiv80 | brain, superior frontal gyrus, female, 44 years | 80, AA | superior frontal gyrus | female | age (yrs): 44 |     |     |         |
| GSM300293  | EntorhinalCortex_female_48yrs_indiv81     | brain, entorhinal cortex, female, 48 years      | 81, AA | entorhinal cortex      | female | age (yrs): 48 |     |     |         |
| GSM300294  | Hippocampus_female_48yrs_indiv81          | brain, hippocampus, female, 48 years            | 81, AA | hippocampus            | female | age (yrs): 48 |     |     |         |
| GSM300295  | PostcentralGyrus_female_48yrs_indiv81     | brain, postcentral gyrus, female, 48 years      | 81, AA | postcentral gyrus      | female | age (yrs): 48 |     |     |         |
| GSM300296  | SuperiorFrontalGyrus_female_48yrs_indiv81 | brain, superior frontal gyrus, female, 48 years | 81, AA | superior frontal gyrus | female | age (yrs): 48 |     |     |         |
| GSM300297  | EntorhinalCortex_female_30yrs_indiv82     | brain, entorhinal cortex, female, 30 years      | 82, AA | entorhinal cortex      | female | age (yrs): 30 |     |     |         |
| GSM300298  | Hippocampus_female_30yrs_indiv82          | brain, hippocampus, female, 30 years            | 82, AA | hippocampus            | female | age (yrs): 30 |     |     |         |
| GSM300299  | SuperiorFrontalGyrus_female_30yrs_indiv82 | brain, superior frontal gyrus, female, 30 years | 82, AA | superior frontal gyrus | female | age (yrs): 30 |     |     |         |
| GSM300300  | EntorhinalCortex_male_20yrs_indiv83       | brain, entorhinal cortex, male, 20 years        | 83, C  | entorhinal cortex      | male   | age (yrs): 20 |     |     |         |
| GSM300301  | Hippocampus_male_20yrs_indiv83            | brain, hippocampus, male, 20 years              | 83, C  | hippocampus            | male   | age (yrs): 20 |     |     |         |
| GSM300302  | PostcentralGyrus_male_20yrs_indiv83       | brain, postcentral gyrus, male, 20 years        | 83, C  | postcentral gyrus      | male   | age (yrs): 20 |     |     |         |
| GSM300303  | SuperiorFrontalGyrus_male_20yrs_indiv83   | brain, superior frontal gyrus, male, 20 years   | 83, C  | superior frontal gyrus | male   | age (yrs): 20 |     |     |         |
| GSM300304  | EntorhinalCortex_male_33yrs_indiv84       | brain, entorhinal cortex, male, 33 years        | 84, AA | entorhinal cortex      | male   | age (yrs): 33 |     |     |         |
| GSM300305  | Hippocampus_male_33yrs_indiv84            | brain, hippocampus, male, 33 years              | 84, AA | hippocampus            | male   | age (yrs): 33 |     |     |         |
| GSM300306  | PostcentralGyrus_male_33yrs_indiv84       | brain, postcentral gyrus, male, 33 years        | 84, AA | postcentral gyrus      | male   | age (yrs): 33 |     |     |         |
| GSM300307  | SuperiorFrontalGyrus_male_33yrs_indiv84   | brain, superior frontal gyrus, male, 33 years   | 84, AA | superior frontal gyrus | male   | age (yrs): 33 |     |     |         |
| GSM300308  | EntorhinalCortex_male_22yrs_indiv85       | brain, entorhinal cortex, male, 22 years        | 85, C  | entorhinal cortex      | male   | age (yrs): 22 |     |     |         |
| GSM300309  | Hippocampus_male_22yrs_indiv85            | brain, hippocampus, male, 22 years              | 85, C  | hippocampus            | male   | age (yrs): 22 |     |     |         |
| GSM300310  | PostcentralGyrus_male_22yrs_indiv85       | brain, postcentral gyrus, male, 22 years        | 85, C  | postcentral gyrus      | male   | age (yrs): 22 |     |     |         |
| GSM300311  | SuperiorFrontalGyrus_male_22yrs_indiv85   | brain, superior frontal gyrus, male, 22 years   | 85, C  | superior frontal gyrus | male   | age (yrs): 22 |     |     |         |
| GSM300312  | EntorhinalCortex_male_42yrs_indiv86       | brain, entorhinal cortex, male, 42 years        | 86, AA | entorhinal cortex      | male   | age (yrs): 42 |     |     |         |
| GSM300313  | Hippocampus_male_42yrs_indiv86            | brain, hippocampus, male, 42 years              | 86, AA | hippocampus            | male   | age (yrs): 42 |     |     |         |
| GSM300314  | PostcentralGyrus_male_42yrs_indiv86       | brain, postcentral gyrus, male, 42 years        | 86, AA | postcentral gyrus      | male   | age (yrs): 42 |     |     |         |
| GSM300315  | SuperiorFrontalGyrus_male_42yrs_indiv86   | brain, superior frontal gyrus, male, 42 years   | 86, AA | superior frontal gyrus | male   | age (yrs): 42 |     |     |         |
| GSM300316  | EntorhinalCortex_male_45yrs_indiv87       | brain, entorhinal cortex, male, 45 years        | 87, C  | entorhinal cortex      | male   | age (yrs): 45 |     |     |         |
| GSM300317  | Hippocampus_male_45yrs_indiv87            | brain, hippocampus, male, 45 years              | 87, C  | hippocampus            | male   | age (yrs): 45 |     |     |         |
| GSM300318  | PostcentralGyrus_male_45yrs_indiv87       | brain, postcentral gyrus, male, 45 years        | 87, C  | postcentral gyrus      | male   | age (yrs): 45 |     |     |         |
| GSM300319  | SuperiorFrontalGyrus_male_45yrs_indiv87   | brain, superior frontal gyrus, male, 45 years   | 87, C  | superior frontal gyrus | male   | age (yrs): 45 |     |     |         |
| GSM300320  | EntorhinalCortex_female_47yrs_indiv88     | brain, entorhinal cortex, female, 47 years      | 88, AA | entorhinal cortex      | female | age (yrs): 47 |     |     |         |
| GSM300321  | Hippocampus_female_47yrs_indiv88          | brain, hippocampus, female, 47 years            | 88, AA | hippocampus            | female | age (yrs): 47 |     |     |         |
| GSM300322  | PostcentralGyrus_female_47yrs_indiv88     | brain, postcentral gyrus, female, 47 years      | 88, AA | postcentral gyrus      | female | age (yrs): 47 |     |     |         |
| GSM300323  | SuperiorFrontalGyrus_female_47yrs_indiv88 | brain, superior frontal gyrus, female, 47 years | 88, AA | superior frontal gyrus | female | age (yrs): 47 |     |     |         |
| GSM300324  | EntorhinalCortex_male_69yrs_indiv93       | brain, entorhinal cortex, male, 69 years        | 93, C  | entorhinal cortex      | male   | age (yrs): 69 |     |     |         |
| GSM300325  | Hippocampus_male_69yrs_indiv93            | brain, hippocampus, male, 69 years              | 93, C  | hippocampus            | male   | age (yrs): 69 |     |     |         |
| GSM300326  | PostcentralGyrus_male_69yrs_indiv93       | brain, postcentral gyrus, male, 69 years        | 93, C  | postcentral gyrus      | male   | age (yrs): 69 |     |     |         |
| GSM300327  | SuperiorFrontalGyrus_male_69yrs_indiv93   | brain, superior frontal gyrus, male, 69 years   | 93, C  | superior frontal gyrus | male   | age (yrs): 69 |     |     |         |
| GSM300328  | EntorhinalCortex_female_91yrs_indiv94     | brain, entorhinal cortex, female, 91 years      | 94, C  | entorhinal cortex      | female | age (yrs): 91 |     |     |         |
| GSM300329  | Hippocampus_female_91yrs_indiv94          | brain, hippocampus, female, 91 years            | 94, C  | hippocampus            | female | age (yrs): 91 |     |     |         |
| GSM300330  | PostcentralGyrus_female_91yrs_indiv94     | brain, postcentral gyrus, female, 91 years      | 94, C  | postcentral gyrus      | female | age (yrs): 91 |     |     |         |
| GSM300331  | SuperiorFrontalGyrus_female_91yrs_indiv94 | brain, superior frontal gyrus, female, 91 years | 94, C  | superior frontal gyrus | female | age (yrs): 91 |     |     |         |
| GSM300332  | EntorhinalCortex_male_75yrs_indiv96       | brain, entorhinal cortex, male, 75 years        | 96, C  | entorhinal cortex      | male   | age (yrs): 75 |     |     |         |
| GSM300333  | Hippocampus_male_75yrs_indiv96            | brain, hippocampus, male, 75 years              | 96, C  | hippocampus            | male   | age (yrs): 75 |     |     |         |
| GSM300334  | SuperiorFrontalGyrus_male_75yrs_indiv96   | brain, superior frontal gyrus, male, 75 years   | 96, C  | superior frontal gyrus | male   | age (yrs): 75 |     |     |         |
| GSM300335  | EntorhinalCortex_female_82yrs_indiv98     | brain, entorhinal cortex, female, 82 years      | 98, C  | entorhinal cortex      | female | age (yrs): 82 |     |     |         |
| GSM300336  | Hippocampus_female_82yrs_indiv98          | brain, hippocampus, female, 82 years            | 98, C  | hippocampus            | female | age (yrs): 82 |     |     |         |
| GSM300337  | PostcentralGyrus_female_82yrs_indiv98     | brain, postcentral gyrus, female, 82 years      | 98, C  | postcentral gyrus      | female | age (yrs): 82 |     |     |         |
| GSM300338  | SuperiorFrontalGyrus_female_82yrs_indiv98 | brain, superior frontal gyrus, female, 82 years | 98, C  | superior frontal gyrus | female | age (yrs): 82 |     |     |         |
| GSM318840  | SuperiorFrontalGyrus_male_66yrs_indiv63   | brain, superior frontal gyrus, male, 66 years   | 63, C  | superior frontal gyrus | male   | age (yrs): 66 |     |     |         |
| GSM350078  | SuperiorFrontalGyrus_male_80yrs_indiv15   | brain, superior frontal gyrus, male, 80 years   | 15, C  | superior frontal gyrus | male   | age (yrs): 80 |     |     |         |
| GSM1176196 | entorhinal cortex_female_76_AD_48         | entorhinal cortex_female_AD                     |        | entorhinal cortex      | female | age (yrs): 76 | V   | 3,3 | 3       |
| GSM1176197 | entorhinal cortex_female_86_AD_15         | entorhinal cortex_female_AD                     |        | entorhinal cortex      | female | age (yrs): 86 | VI  | 4,4 | 9       |
| GSM1176198 | entorhinal cortex_female_82_AD_9          | entorhinal cortex_female_AD                     |        | entorhinal cortex      | female | age (yrs): 82 | VI  | 3,4 | 0       |
| GSM1176199 | entorhinal cortex_female_85_AD_24         | entorhinal cortex_female_AD                     |        | entorhinal cortex      | female | age (yrs): 85 | IV  | 3,4 | 26      |
| GSM1176200 | entorhinal cortex_female_90_AD_36         | entorhinal cortex_female_AD                     |        | entorhinal cortex      | female | age (yrs): 90 | IV  | 3,4 | 17      |
| GSM1176201 | entorhinal cortex_female_90_AD_6          | entorhinal cortex_female_AD                     |        | entorhinal cortex      | female | age (yrs): 90 | V   | 3,4 | 20      |
| GSM1176202 | entorhinal cortex_female_90_AD_75         | entorhinal cortex_female_AD                     |        | entorhinal cortex      | female | age (yrs): 90 | III | 4,4 | no info |

|            |                                        |                                  |                        |        |               |         |     |         |
|------------|----------------------------------------|----------------------------------|------------------------|--------|---------------|---------|-----|---------|
| GSM1176203 | entorhinal cortex_female_91_AD_11      | entorhinal cortex_female_AD      | entorhinal cortex      | female | age (yrs): 91 | V-VI    | 4,4 | 11      |
| GSM1176204 | entorhinal cortex_male_76_AD_69        | entorhinal cortex_male_AD        | entorhinal cortex      | male   | age (yrs): 76 | III     | 4,4 | no info |
| GSM1176205 | entorhinal cortex_male_85_AD_51        | entorhinal cortex_male_AD        | entorhinal cortex      | male   | age (yrs): 85 | III     | 3,3 | 22      |
| GSM1176206 | entorhinal cortex_male_85_AD_74        | entorhinal cortex_male_AD        | entorhinal cortex      | male   | age (yrs): 85 | II      | 3,4 | no info |
| GSM1176207 | entorhinal cortex_male_86_AD_92        | entorhinal cortex_male_AD        | entorhinal cortex      | male   | age (yrs): 86 | IV      | 3,3 | 19      |
| GSM1176208 | entorhinal cortex_male_87_AD_19        | entorhinal cortex_male_AD        | entorhinal cortex      | male   | age (yrs): 87 | V       | 3,4 | 12      |
| GSM1176209 | entorhinal cortex_male_94_AD_5         | entorhinal cortex_male_AD        | entorhinal cortex      | male   | age (yrs): 94 | VI      | 3,3 | 15      |
| GSM1176210 | entorhinal cortex_male_94_AD_90        | entorhinal cortex_male_AD        | entorhinal cortex      | male   | age (yrs): 94 | IV      | 3,3 | no info |
| GSM1176211 | hippocampus_female_60_AD_20            | hippocampus_female_AD            | hippocampus            | female | age (yrs): 60 | VI      | 3,4 | 12      |
| GSM1176212 | hippocampus_female_74_AD_37            | hippocampus_female_AD            | hippocampus            | female | age (yrs): 74 | VI      | 2,4 | 17      |
| GSM1176213 | hippocampus_female_76_AD_48            | hippocampus_female_AD            | hippocampus            | female | age (yrs): 76 | V       | 3,3 | 3       |
| GSM1176214 | hippocampus_female_79_AD_16            | hippocampus_female_AD            | hippocampus            | female | age (yrs): 79 | VI      | 3,4 | 0       |
| GSM1176215 | hippocampus_female_86_AD_15            | hippocampus_female_AD            | hippocampus            | female | age (yrs): 86 | VI      | 4,4 | 9       |
| GSM1176216 | hippocampus_female_85_AD_24            | hippocampus_female_AD            | hippocampus            | female | age (yrs): 85 | IV      | 3,4 | 26      |
| GSM1176217 | hippocampus_female_90_AD_23            | hippocampus_female_AD            | hippocampus            | female | age (yrs): 90 | VI      | 3,4 | 12      |
| GSM1176218 | hippocampus_female_90_AD_36            | hippocampus_female_AD            | hippocampus            | female | age (yrs): 90 | IV      | 3,4 | 17      |
| GSM1176219 | hippocampus_female_90_AD_75            | hippocampus_female_AD            | hippocampus            | female | age (yrs): 90 | III     | 4,4 | no info |
| GSM1176220 | hippocampus_female_91_AD_11            | hippocampus_female_AD            | hippocampus            | female | age (yrs): 91 | V-VI    | 4,4 | 11      |
| GSM1176221 | hippocampus_male_76_AD_33              | hippocampus_male_AD              | hippocampus            | male   | age (yrs): 76 | V       | 4,4 | 0       |
| GSM1176222 | hippocampus_male_76_AD_69              | hippocampus_male_AD              | hippocampus            | male   | age (yrs): 76 | III     | 4,4 | no info |
| GSM1176223 | hippocampus_male_79_AD_7               | hippocampus_male_AD              | hippocampus            | male   | age (yrs): 79 | VI      | 3,4 | 6       |
| GSM1176224 | hippocampus_male_80_AD_43              | hippocampus_male_AD              | hippocampus            | male   | age (yrs): 80 | no info | 3,3 | 23      |
| GSM1176225 | hippocampus_male_85_AD_51              | hippocampus_male_AD              | hippocampus            | male   | age (yrs): 85 | III     | 3,3 | 22      |
| GSM1176226 | hippocampus_male_86_AD_92              | hippocampus_male_AD              | hippocampus            | male   | age (yrs): 86 | IV      | 3,3 | 19      |
| GSM1176227 | hippocampus_male_87_AD_19              | hippocampus_male_AD              | hippocampus            | male   | age (yrs): 87 | V       | 3,4 | 12      |
| GSM1176228 | hippocampus_male_94_AD_5               | hippocampus_male_AD              | hippocampus            | male   | age (yrs): 94 | VI      | 3,3 | 15      |
| GSM1176229 | hippocampus_male_94_AD_90              | hippocampus_male_AD              | hippocampus            | male   | age (yrs): 94 | IV      | 3,3 | no info |
| GSM1176230 | post-central gyrus_female_60_AD_20     | post-central gyrus_female_AD     | post-central gyrus     | female | age (yrs): 60 | VI      | 3,4 | 12      |
| GSM1176231 | post-central gyrus_female_74_AD_37     | post-central gyrus_female_AD     | post-central gyrus     | female | age (yrs): 74 | VI      | 2,4 | 17      |
| GSM1176232 | post-central gyrus_female_76_AD_48     | post-central gyrus_female_AD     | post-central gyrus     | female | age (yrs): 76 | V       | 3,3 | 3       |
| GSM1176233 | post-central gyrus_female_86_AD_15     | post-central gyrus_female_AD     | post-central gyrus     | female | age (yrs): 86 | VI      | 4,4 | 9       |
| GSM1176234 | post-central gyrus_female_82_AD_13     | post-central gyrus_female_AD     | post-central gyrus     | female | age (yrs): 82 | VI      | 3,4 | 4       |
| GSM1176235 | post-central gyrus_female_82_AD_9      | post-central gyrus_female_AD     | post-central gyrus     | female | age (yrs): 82 | VI      | 3,4 | 0       |
| GSM1176236 | post-central gyrus_female_85_AD_24     | post-central gyrus_female_AD     | post-central gyrus     | female | age (yrs): 85 | IV      | 3,4 | 26      |
| GSM1176237 | post-central gyrus_female_85_AD_57     | post-central gyrus_female_AD     | post-central gyrus     | female | age (yrs): 85 | V       | 3,3 | no info |
| GSM1176238 | post-central gyrus_female_90_AD_23     | post-central gyrus_female_AD     | post-central gyrus     | female | age (yrs): 90 | VI      | 3,4 | 12      |
| GSM1176239 | post-central gyrus_female_90_AD_36     | post-central gyrus_female_AD     | post-central gyrus     | female | age (yrs): 90 | IV      | 3,4 | 17      |
| GSM1176240 | post-central gyrus_female_90_AD_6      | post-central gyrus_female_AD     | post-central gyrus     | female | age (yrs): 90 | V       | 3,4 | 20      |
| GSM1176241 | post-central gyrus_female_90_AD_75     | post-central gyrus_female_AD     | post-central gyrus     | female | age (yrs): 90 | III     | 4,4 | no info |
| GSM1176242 | post-central gyrus_female_91_AD_11     | post-central gyrus_female_AD     | post-central gyrus     | female | age (yrs): 91 | V-VI    | 4,4 | 11      |
| GSM1176243 | post-central gyrus_female_94_AD_70     | post-central gyrus_female_AD     | post-central gyrus     | female | age (yrs): 94 | I       | 3,3 | no info |
| GSM1176244 | post-central gyrus_female_95_AD_64     | post-central gyrus_female_AD     | post-central gyrus     | female | age (yrs): 95 | no info | 3,3 | no info |
| GSM1176245 | post-central gyrus_male_76_AD_33       | post-central gyrus_male_AD       | post-central gyrus     | male   | age (yrs): 76 | V       | 4,4 | 0       |
| GSM1176246 | post-central gyrus_male_76_AD_69       | post-central gyrus_male_AD       | post-central gyrus     | male   | age (yrs): 76 | III     | 4,4 | no info |
| GSM1176247 | post-central gyrus_male_79_AD_7        | post-central gyrus_male_AD       | post-central gyrus     | male   | age (yrs): 79 | VI      | 3,4 | 6       |
| GSM1176248 | post-central gyrus_male_85_AD_51       | post-central gyrus_male_AD       | post-central gyrus     | male   | age (yrs): 85 | III     | 3,3 | 22      |
| GSM1176249 | post-central gyrus_male_85_AD_74       | post-central gyrus_male_AD       | post-central gyrus     | male   | age (yrs): 85 | II      | 3,4 | no info |
| GSM1176250 | post-central gyrus_male_86_AD_92       | post-central gyrus_male_AD       | post-central gyrus     | male   | age (yrs): 86 | IV      | 3,3 | 19      |
| GSM1176251 | post-central gyrus_male_87_AD_19       | post-central gyrus_male_AD       | post-central gyrus     | male   | age (yrs): 87 | V       | 3,4 | 12      |
| GSM1176252 | post-central gyrus_male_94_AD_44       | post-central gyrus_male_AD       | post-central gyrus     | male   | age (yrs): 94 | IV      | 3,4 | 18      |
| GSM1176253 | post-central gyrus_male_94_AD_5        | post-central gyrus_male_AD       | post-central gyrus     | male   | age (yrs): 94 | VI      | 3,3 | 15      |
| GSM1176254 | post-central gyrus_male_94_AD_90       | post-central gyrus_male_AD       | post-central gyrus     | male   | age (yrs): 94 | IV      | 3,3 | no info |
| GSM1176255 | superior frontal gyrus_female_74_AD_37 | superior frontal gyrus_female_AD | superior frontal gyrus | female | age (yrs): 74 | VI      | 2,4 | 17      |
| GSM1176256 | superior frontal gyrus_female_76_AD_48 | superior frontal gyrus_female_AD | superior frontal gyrus | female | age (yrs): 76 | V       | 3,3 | 3       |
| GSM1176257 | superior frontal gyrus_female_86_AD_15 | superior frontal gyrus_female_AD | superior frontal gyrus | female | age (yrs): 86 | VI      | 4,4 | 9       |
| GSM1176258 | superior frontal gyrus_female_82_AD_9  | superior frontal gyrus_female_AD | superior frontal gyrus | female | age (yrs): 82 | VI      | 3,4 | 0       |
| GSM1176259 | superior frontal gyrus_female_85_AD_24 | superior frontal gyrus_female_AD | superior frontal gyrus | female | age (yrs): 85 | IV      | 3,4 | 26      |
| GSM1176260 | superior frontal gyrus_female_85_AD_57 | superior frontal gyrus_female_AD | superior frontal gyrus | female | age (yrs): 85 | V       | 3,3 | no info |
| GSM1176261 | superior frontal gyrus_female_88_AD_91 | superior frontal gyrus_female_AD | superior frontal gyrus | female | age (yrs): 88 | IV      | 3,4 | 27      |
| GSM1176262 | superior frontal gyrus_female_90_AD_23 | superior frontal gyrus_female_AD | superior frontal gyrus | female | age (yrs): 90 | VI      | 3,4 | 12      |
| GSM1176263 | superior frontal gyrus_female_90_AD_36 | superior frontal gyrus_female_AD | superior frontal gyrus | female | age (yrs): 90 | IV      | 3,4 | 17      |

|            |                                        |                                  |                        |        |               |         |     |         |
|------------|----------------------------------------|----------------------------------|------------------------|--------|---------------|---------|-----|---------|
| GSM1176264 | superior frontal gyrus_female_90_AD_6  | superior frontal gyrus_female_AD | superior frontal gyrus | female | age (yrs): 90 | V       | 3,4 | 20      |
| GSM1176265 | superior frontal gyrus_female_90_AD_75 | superior frontal gyrus_female_AD | superior frontal gyrus | female | age (yrs): 90 | III     | 4,4 | no info |
| GSM1176266 | superior frontal gyrus_female_91_AD_11 | superior frontal gyrus_female_AD | superior frontal gyrus | female | age (yrs): 91 | V-VI    | 4,4 | 11      |
| GSM1176267 | superior frontal gyrus_female_94_AD_70 | superior frontal gyrus_female_AD | superior frontal gyrus | female | age (yrs): 94 | I       | 3,3 | no info |
| GSM1176268 | superior frontal gyrus_female_95_AD_64 | superior frontal gyrus_female_AD | superior frontal gyrus | female | age (yrs): 95 | no info | 3,3 | no info |
| GSM1176269 | superior frontal gyrus_male_76_AD_33   | superior frontal gyrus_male_AD   | superior frontal gyrus | male   | age (yrs): 76 | V       | 4,4 | 0       |
| GSM1176270 | superior frontal gyrus_male_85_AD_51   | superior frontal gyrus_male_AD   | superior frontal gyrus | male   | age (yrs): 85 | III     | 3,3 | 22      |
| GSM1176271 | superior frontal gyrus_male_85_AD_74   | superior frontal gyrus_male_AD   | superior frontal gyrus | male   | age (yrs): 85 | II      | 3,4 | no info |
| GSM1176272 | superior frontal gyrus_male_86_AD_92   | superior frontal gyrus_male_AD   | superior frontal gyrus | male   | age (yrs): 86 | IV      | 3,3 | 19      |
| GSM1176273 | superior frontal gyrus_male_94_AD_44   | superior frontal gyrus_male_AD   | superior frontal gyrus | male   | age (yrs): 94 | IV      | 3,4 | 18      |
| GSM1176274 | superior frontal gyrus_male_94_AD_5    | superior frontal gyrus_male_AD   | superior frontal gyrus | male   | age (yrs): 94 | VI      | 3,3 | 15      |
| GSM1176275 | superior frontal gyrus_male_94_AD_90   | superior frontal gyrus_male_AD   | superior frontal gyrus | male   | age (yrs): 94 | IV      | 3,3 | no info |
