# Supplementary material for: Integrated analysis and identification of hub genes as novel biomarkers for Alzheimer’s disease
Source: PubMed Central journal article supplement (PMC9468260; doi:10.3389/fnagi.2022.901972), 2022-08-30
Supplement: Data_Sheet_2.pdf [file Data_Sheet_2.pdf]

## GSE5281

| Group  | Accession | Title          | Organ Region          | Cell Type         | Sex    | Age |
|--------|-----------|----------------|-----------------------|-------------------|--------|-----|
| normal | GSM119615 | EC control 1   | Entorhinal Cortex     | layer III neurons | male   | 63  |
| normal | GSM119616 | EC control 2   | Entorhinal Cortex     | layer III neurons | male   | 85  |
| normal | GSM119617 | EC control 3   | Entorhinal Cortex     | layer III neurons | male   | 80  |
| normal | GSM119618 | EC control 4   | Entorhinal Cortex     | layer III neurons | male   | 80  |
| normal | GSM119619 | EC control 5   | Entorhinal Cortex     | layer III neurons | female | 102 |
| normal | GSM119620 | EC control 6   | Entorhinal Cortex     | layer III neurons | male   | 79  |
| normal | GSM119621 | EC control 7   | Entorhinal Cortex     | layer III neurons | male   | 76  |
| normal | GSM119622 | EC control 8   | Entorhinal Cortex     | layer III neurons | male   | 83  |
| normal | GSM119623 | EC control 9   | Entorhinal Cortex     | layer III neurons | male   | 79  |
| normal | GSM119624 | EC control 10  | Entorhinal Cortex     | layer III neurons | female | 88  |
| normal | GSM119625 | EC control 11  | Entorhinal Cortex     | layer III neurons | female | 82  |
| normal | GSM119626 | EC control 12  | Entorhinal Cortex     | layer III neurons | male   | 69  |
| normal | GSM119627 | EC control 13  | Entorhinal Cortex     | layer III neurons | male   | 78  |
| normal | GSM119628 | HIP control 1  | hippocampus           | layer III neurons | male   | 85  |
| normal | GSM119629 | HIP control 2  | hippocampus           | layer III neurons | male   | 80  |
| normal | GSM119630 | HIP control 3  | hippocampus           | layer III neurons | male   | 80  |
| normal | GSM119631 | HIP control 4  | hippocampus           | layer III neurons | female | 102 |
| normal | GSM119632 | HIP control 5  | hippocampus           | layer III neurons | male   | 63  |
| normal | GSM119633 | HIP control 6  | hippocampus           | layer III neurons | male   | 79  |
| normal | GSM119634 | HIP control 7  | hippocampus           | layer III neurons | male   | 76  |
| normal | GSM119635 | HIP control 8  | hippocampus           | layer III neurons | male   | 83  |
| normal | GSM119636 | HIP control 9  | hippocampus           | layer III neurons | male   | 79  |
| normal | GSM119637 | HIP control 10 | hippocampus           | layer III neurons | female | 88  |
| normal | GSM119638 | HIP control 11 | hippocampus           | layer III neurons | female | 73  |
| normal | GSM119639 | HIP control 12 | hippocampus           | layer III neurons | male   | 69  |
| normal | GSM119640 | HIP control 13 | hippocampus           | layer III neurons | male   | 78  |
| normal | GSM119641 | MTG control 1  | Medial Temporal Gyrus | layer III neurons | male   | 85  |
| normal | GSM119642 | MTG control 2  | Medial Temporal Gyrus | layer III neurons | male   | 80  |
| normal | GSM119643 | MTG control 3  | Medial Temporal Gyrus | layer III neurons | female | 102 |
| normal | GSM119644 | MTG control 4  | Medial Temporal Gyrus | layer III neurons | male   | 63  |
| normal | GSM119645 | MTG control 5  | Medial Temporal Gyrus | layer III neurons | male   | 79  |
| normal | GSM119646 | MTG control 6  | Medial Temporal Gyrus | layer III neurons | male   | 83  |
| normal | GSM119647 | MTG control 7  | Medial Temporal Gyrus | layer III neurons | male   | 79  |
| normal | GSM119648 | MTG control 8  | Medial Temporal Gyrus | layer III neurons | female | 88  |
| normal | GSM119649 | MTG control 9  | Medial Temporal Gyrus | layer III neurons | female | 82  |
| normal | GSM119650 | MTG control 10 | Medial Temporal Gyrus | layer III neurons | female | 73  |

|                     |           |                |                        |                   |        |     |
|---------------------|-----------|----------------|------------------------|-------------------|--------|-----|
| normal              | GSM119651 | MTG control 11 | Medial Temporal Gyrus  | layer III neurons | male   | 69  |
| normal              | GSM119652 | MTG control 12 | Medial Temporal Gyrus  | layer III neurons | male   | 78  |
| normal              | GSM119653 | PC control 1   | Posterior Cingulate    | layer III neurons | male   | 85  |
| normal              | GSM119654 | PC control 2   | Posterior Cingulate    | layer III neurons | male   | 80  |
| normal              | GSM119655 | PC control 3   | Posterior Cingulate    | layer III neurons | female | 102 |
| normal              | GSM119656 | PC control 4   | Posterior Cingulate    | layer III neurons | male   | 63  |
| normal              | GSM119657 | PC control 5   | Posterior Cingulate    | layer III neurons | male   | 79  |
| normal              | GSM119658 | PC control 6   | Posterior Singulate    | layer III neurons | male   | 76  |
| normal              | GSM119659 | PC control 7   | Posterior cingulate    | layer III neurons | male   | 83  |
| normal              | GSM119660 | PC control 8   | Posterior cingulate    | layer III neurons | male   | 79  |
| normal              | GSM119661 | PC control 9   | Posterior cingulate    | layer III neurons | female | 88  |
| normal              | GSM119662 | PC control 10  | Posterior cingulate    | layer III neurons | female | 82  |
| normal              | GSM119663 | PC control 11  | Posterior cingulate    | layer III neurons | female | 73  |
| normal              | GSM119664 | PC control 12  | Posterior cingulate    | layer III neurons | male   | 69  |
| normal              | GSM119665 | PC control 13  | Posterior cingulate    | layer III neurons | male   | 78  |
| normal              | GSM119666 | SFG control 1  | Superior Frontal Gyrus | layer III neurons | male   | 79  |
| normal              | GSM119667 | SFG control 2  | Superior Frontal Gyrus | layer III neurons | female | 88  |
| normal              | GSM119668 | SFG control 3  | Superior Frontal Gyrus | layer III neurons | female | 82  |
| normal              | GSM119669 | SFG control 4  | Superior Frontal Gyrus | layer III neurons | female | 73  |
| normal              | GSM119670 | SFG control 5  | Superior Frontal Gyrus | layer III neurons | female | 102 |
| normal              | GSM119671 | SFG control 6  | Superior Frontal Gyrus | layer III neurons | male   | 63  |
| normal              | GSM119672 | SFG control 7  | Superior Frontal Gyrus | layer III neurons | male   | 79  |
| normal              | GSM119673 | SFG control 8  | Superior Frontal Gyrus | layer III neurons | male   | 76  |
| normal              | GSM119674 | SFG control 9  | Superior Frontal Gyrus | layer III neurons | male   | 83  |
| normal              | GSM119675 | SFG control 10 | Superior Frontal Gyrus | layer III neurons | male   | 69  |
| normal              | GSM119676 | SFG control 11 | Superior Frontal Gyrus | layer III neurons | male   | 78  |
| normal              | GSM119677 | VCX control 1  | Primary Visual Cortex  | layer III neurons | male   | 85  |
| normal              | GSM119678 | VCX control 2  | Primary Visual Cortex  | layer III neurons | male   | 80  |
| normal              | GSM119679 | VCX control 3  | Primary Visual Cortex  | layer III neurons | male   | 63  |
| normal              | GSM119680 | VCX control 4  | Primary Visual Cortex  | layer III neurons | male   | 79  |
| normal              | GSM119681 | VCX control 5  | Primary Visual Cortex  | layer III neurons | male   | 76  |
| normal              | GSM119682 | VCX control 6  | Primary Visual Cortex  | layer III neurons | male   | 83  |
| normal              | GSM119683 | VCX control 7  | Primary Visual Cortex  | layer III neurons | male   | 79  |
| normal              | GSM119684 | VCX control 8  | Primary Visual Cortex  | layer III neurons | female | 88  |
| normal              | GSM119685 | VCX control 9  | Primary Visual Cortex  | layer III neurons | female | 82  |
| normal              | GSM119686 | VCX control 10 | Primary Visual Cortex  | layer III neurons | female | 73  |
| normal              | GSM119687 | VCX control 11 | Primary Visual Cortex  | layer III neurons | male   | 69  |
| normal              | GSM119688 | VCX control 12 | Primary Visual Cortex  | layer III neurons | male   | 78  |
| Alzheimer's Disease | GSM238763 | EC_affected_1  | Entorhinal Cortex      | pyramidal neuron  | female | 82  |
| Alzheimer's Disease | GSM238790 | EC_affected_2  | Entorhinal Cortex      | pyramidal neuron  | female | 86  |

|                     |           |                 |                       |                   |        |      |
|---------------------|-----------|-----------------|-----------------------|-------------------|--------|------|
| Alzheimer's Disease | GSM238791 | EC_affected_3   | Entorhinal Cortex     | pyramidal neuron  | female | 93   |
| Alzheimer's Disease | GSM238792 | EC_affected_4   | Entorhinal Cortex     | pyramidal neuron  | male   | 84   |
| Alzheimer's Disease | GSM238793 | EC_affected_5   | Entorhinal Cortex     | pyramidal neuron  | female | 79   |
| Alzheimer's Disease | GSM238794 | EC_affected_6   | Entorhinal Cortex     | pyramidal neuron  | female | 78   |
| Alzheimer's Disease | GSM238795 | EC_affected_7   | Entorhinal Cortex     | pyramidal neuron  | female | 91   |
| Alzheimer's Disease | GSM238796 | EC_affected_8   | Entorhinal Cortex     | pyramidal neuron  | male   | 86   |
| Alzheimer's Disease | GSM238797 | EC_affected_9   | Entorhinal Cortex     | pyramidal neuron  | male   | 97   |
| Alzheimer's Disease | GSM238798 | EC_affected_10  | Entorhinal Cortex     | pyramidal neuron  | male   | 80   |
| Alzheimer's Disease | GSM238799 | HIP_affected_1  | hippocampus           | pyramidal neuron  | male   | 72   |
| Alzheimer's Disease | GSM238800 | HIP_affected_2  | hippocampus           | pyramidal neuron  | female | 73   |
| Alzheimer's Disease | GSM238801 | HIP_affected_3  | hippocampus           | pyramidal neuron  | male   | 75   |
| Alzheimer's Disease | GSM238802 | HIP_affected_4  | hippocampus           | pyramidal neuron  | female | 70   |
| Alzheimer's Disease | GSM238803 | HIP_affected_5  | hippocampus           | pyramidal neuron  | female | 85   |
| Alzheimer's Disease | GSM238804 | HIP_affected_6  | hippocampus           | pyramidal neuron  | female | 77   |
| Alzheimer's Disease | GSM238805 | HIP_affected_7  | hippocampus           | pyramidal neuron  | male   | 79   |
| Alzheimer's Disease | GSM238806 | HIP_affected_8  | hippocampus           | pyramidal neuron  | male   | 88   |
| Alzheimer's Disease | GSM238807 | HIP_affected_9  | hippocampus           | pyramidal neuron  | male   | 81   |
| Alzheimer's Disease | GSM238808 | HIP_affected_10 | hippocampus           | layer III neurons | male   | 78   |
| Alzheimer's Disease | GSM238809 | MTG_affected_1  | Medial Temporal Gyrus | pyramidal neuron  | female | 73   |
| Alzheimer's Disease | GSM238810 | MTG_affected_2  | Medial Temporal Gyrus | pyramidal neuron  | male   | 81   |
| Alzheimer's Disease | GSM238811 | MTG_affected_3  | Medial Temporal Gyrus | pyramidal neuron  | male   | 72   |
| Alzheimer's Disease | GSM238812 | MTG_affected_4  | Medial Temporal Gyrus | pyramidal neuron  | male   | 75   |
| Alzheimer's Disease | GSM238813 | MTG_affected_5  | Medial Temporal Gyrus | pyramidal neuron  | male   | 78   |
| Alzheimer's Disease | GSM238815 | MTG_affected_6  | Medial Temporal Gyrus | pyramidal neuron  | male   | 75   |
| Alzheimer's Disease | GSM238816 | MTG_affected_7  | Medial Temporal Gyrus | pyramidal neuron  | male   | 87   |
| Alzheimer's Disease | GSM238817 | MTG_affected_8  | Medial Temporal Gyrus | pyramidal neuron  | female | >90  |
| Alzheimer's Disease | GSM238818 | MTG_affected_9  | Medial Temporal Gyrus | pyramidal neuron  | male   | 68   |
| Alzheimer's Disease | GSM238819 | MTG_affected_10 | Medial Temporal Gyrus | pyramidal neuron  | female | 81   |
| Alzheimer's Disease | GSM238820 | MTG_affected_11 | Medial Temporal Gyrus | pyramidal neuron  | female | 85   |
| Alzheimer's Disease | GSM238821 | MTG_affected_12 | Medial Temporal Gyrus | pyramidal neuron  | male   | 79   |
| Alzheimer's Disease | GSM238822 | MTG_affected_13 | Medial Temporal Gyrus | layer III neurons | female | 82   |
| Alzheimer's Disease | GSM238823 | MTG_affected_14 | Medial Temporal Gyrus | layer III neurons | male   | 88   |
| Alzheimer's Disease | GSM238824 | MTG_affected_15 | Medial Temporal Gyrus | layer III neurons | male   | 72   |
| Alzheimer's Disease | GSM238825 | MTG_affected_16 | Medial Temporal Gyrus | layer III neurons | female | 80   |
| Alzheimer's Disease | GSM238826 | PC_affected_1   | Posterior Cingulate   | pyramidal neuron  | female | 73   |
| Alzheimer's Disease | GSM238827 | PC_affected_2   | Posterior Singulate   | pyramidal neuron  | male   | 81   |
| Alzheimer's Disease | GSM238834 | PC_affected_3   | Posterior Singulate   | pyramidal neuron  | male   | 78   |
| Alzheimer's Disease | GSM238835 | PC_affected_4   | Posterior Singulate   | pyramidal neuron  | male   | 75   |
| Alzheimer's Disease | GSM238837 | PC_affected_5   | Posterior Singulate   | pyramidal neuron  | male   | 68   |
| Alzheimer's Disease | GSM238838 | PC_affected_6   | Posterior Singulate   | pyramidal neuron  | female | 70.8 |

|                     |           |                 |                        |                   |        |      |
|---------------------|-----------|-----------------|------------------------|-------------------|--------|------|
| Alzheimer's Disease | GSM238839 | PC_affected_7   | Posterior Singulate    | pyramidal neuron  | female | 85   |
| Alzheimer's Disease | GSM238840 | PC_affected_8   | Posterior Singulate    | pyramidal neuron  | male   | 79   |
| Alzheimer's Disease | GSM238841 | PC_affected_9   | Posterior Singulate    | pyramidal neuron  | male   | 88   |
| Alzheimer's Disease | GSM238842 | SFG_affected_1  | Superior Frontal Gyrus | pyramidal neuron  | female | 73   |
| Alzheimer's Disease | GSM238843 | SFG_affected_2  | Superior Frontal Gyrus | pyramidal neuron  | male   | 81   |
| Alzheimer's Disease | GSM238844 | SFG_affected_3  | Superior Frontal Gyrus | pyramidal neuron  | male   | 72   |
| Alzheimer's Disease | GSM238845 | SFG_affected_4  | Superior Frontal Gyrus | pyramidal neuron  | male   | 75   |
| Alzheimer's Disease | GSM238846 | SFG_affected_5  | Superior Frontal Gyrus | pyramidal neuron  | male   | 78   |
| Alzheimer's Disease | GSM238847 | SFG_affected_6  | Superior Frontal Gyrus | pyramidal neuron  | male   | 75   |
| Alzheimer's Disease | GSM238848 | SFG_affected_7  | Superior Frontal Gyrus | pyramidal neuron  | male   | 87   |
| Alzheimer's Disease | GSM238851 | SFG_affected_8  | Superior Frontal Gyrus | pyramidal neuron  | female | 95   |
| Alzheimer's Disease | GSM238854 | SFG_affected_9  | Superior Frontal Gyrus | pyramidal neuron  | male   | 68   |
| Alzheimer's Disease | GSM238855 | SFG_affected_10 | Superior Frontal Gyrus | pyramidal neuron  | female | 95   |
| Alzheimer's Disease | GSM238856 | SFG_affected_11 | Superior Frontal Gyrus | pyramidal neuron  | female | 70.8 |
| Alzheimer's Disease | GSM238857 | SFG_affected_12 | Superior Frontal Gyrus | pyramidal neuron  | female | 85   |
| Alzheimer's Disease | GSM238858 | SFG_affected_13 | Superior Frontal Gyrus | pyramidal neuron  | female | 83   |
| Alzheimer's Disease | GSM238860 | SFG_affected_14 | Superior Frontal Gyrus | pyramidal neuron  | female | 77   |
| Alzheimer's Disease | GSM238861 | SFG_affected_15 | Superior Frontal Gyrus | pyramidal neuron  | female | 83   |
| Alzheimer's Disease | GSM238862 | SFG_affected_16 | Superior Frontal Gyrus | pyramidal neuron  | male   | 68   |
| Alzheimer's Disease | GSM238863 | SFG_affected_17 | Superior Frontal Gyrus | pyramidal neuron  | male   | 79   |
| Alzheimer's Disease | GSM238864 | SFG_affected_18 | Superior Frontal Gyrus | pyramidal neuron  | female | 82   |
| Alzheimer's Disease | GSM238865 | SFG_affected_19 | Superior Frontal Gyrus | pyramidal neuron  | male   | 80   |
| Alzheimer's Disease | GSM238867 | SFG_affected_20 | Superior Frontal Gyrus | pyramidal neuron  | male   | 88   |
| Alzheimer's Disease | GSM238868 | SFG_affected_21 | Superior Frontal Gyrus | pyramidal neuron  | male   | 74   |
| Alzheimer's Disease | GSM238870 | SFG_affected_22 | Superior Frontal Gyrus | pyramidal neuron  | male   | 72   |
| Alzheimer's Disease | GSM238871 | SFG_affected_23 | Superior Frontal Gyrus | layer III neurons | female | 80   |
| Alzheimer's Disease | GSM238872 | VCX_affected_1  | Primary Visual Cortex  | pyramidal neuron  | female | 73   |
| Alzheimer's Disease | GSM238873 | VCX_affected_2  | Primary Visual Cortex  | pyramidal neuron  | male   | 81   |
| Alzheimer's Disease | GSM238874 | VCX_affected_3  | Primary Visual Cortex  | pyramidal neuron  | male   | 75   |
| Alzheimer's Disease | GSM238875 | VCX_affected_4  | Primary Visual Cortex  | pyramidal neuron  | male   | 78   |
| Alzheimer's Disease | GSM238877 | VCX_affected_5  | Primary Visual Cortex  | pyramidal neuron  | male   | 75   |
| Alzheimer's Disease | GSM238941 | VCX_affected_6  | Primary Visual Cortex  | pyramidal neuron  | male   | 87   |
| Alzheimer's Disease | GSM238942 | VCX_affected_7  | Primary Visual Cortex  | pyramidal neuron  | female | 95   |
| Alzheimer's Disease | GSM238943 | VCX_affected_8  | Primary Visual Cortex  | pyramidal neuron  | male   | 68   |
| Alzheimer's Disease | GSM238944 | VCX_affected_9  | Primary Visual Cortex  | pyramidal neuron  | female | >90  |
| Alzheimer's Disease | GSM238945 | VCX_affected_10 | Primary Visual Cortex  | pyramidal neuron  | female | 81.3 |
| Alzheimer's Disease | GSM238946 | VCX_affected_11 | Primary Visual Cortex  | pyramidal neuron  | female | 81   |
| Alzheimer's Disease | GSM238947 | VCX_affected_12 | Primary Visual Cortex  | pyramidal neuron  | female | 85   |
| Alzheimer's Disease | GSM238948 | VCX_affected_13 | Primary Visual Cortex  | pyramidal neuron  | male   | 79   |
| Alzheimer's Disease | GSM238949 | VCX_affected_14 | Primary Visual Cortex  | pyramidal neuron  | male   | 79   |

|                     |           |                 |                       |                   |        |    |
|---------------------|-----------|-----------------|-----------------------|-------------------|--------|----|
| Alzheimer's Disease | GSM238951 | VCX_affected_15 | Primary Visual Cortex | pyramidal neuron  | female | 82 |
| Alzheimer's Disease | GSM238952 | VCX_affected_16 | Primary Visual Cortex | pyramidal neuron  | male   | 88 |
| Alzheimer's Disease | GSM238953 | VCX_affected_17 | Primary Visual Cortex | pyramidal neuron  | male   | 74 |
| Alzheimer's Disease | GSM238955 | VCX_affected_18 | Primary Visual Cortex | layer III neurons | male   | 72 |
| Alzheimer's Disease | GSM238963 | VCX_affected_19 | Primary Visual Cortex | layer III neurons | female | 80 |

---

## GSE28146

| Group               | Accession | Title          | Sex    | Age |
|---------------------|-----------|----------------|--------|-----|
| normal              | GSM697308 | Control 976    | Male   | 85  |
| normal              | GSM697309 | Control 1003   | Male   | 80  |
| normal              | GSM697310 | Control 1008   | Female | 92  |
| normal              | GSM697311 | Control 1012   | Male   | 80  |
| normal              | GSM697312 | Control 1015   | Male   | 75  |
| normal              | GSM697313 | Control 1018   | Female | 97  |
| normal              | GSM697314 | Control 1030   | Male   | 95  |
| normal              | GSM697315 | Control 1040   | Male   | 87  |
| Alzheimer's Disease | GSM697316 | Incipient 715  | Female | 101 |
| Alzheimer's Disease | GSM697317 | Incipient 720  | Female | 95  |
| Alzheimer's Disease | GSM697318 | Incipient 994  | Female | 83  |
| Alzheimer's Disease | GSM697319 | Incipient 1019 | Male   | 88  |
| Alzheimer's Disease | GSM697320 | Incipient 1029 | Female | 91  |
| Alzheimer's Disease | GSM697321 | Incipient 1034 | Male   | 88  |
| Alzheimer's Disease | GSM697322 | Incipient 1043 | Female | 97  |
| Alzheimer's Disease | GSM697323 | Moderate 826   | Female | 85  |
| Alzheimer's Disease | GSM697324 | Moderate 832   | Female | 89  |
| Alzheimer's Disease | GSM697325 | Moderate 856   | Female | 83  |
| Alzheimer's Disease | GSM697326 | Moderate 965   | Female | 82  |
| Alzheimer's Disease | GSM697327 | Moderate 1020  | Female | 79  |
| Alzheimer's Disease | GSM697328 | Moderate 1025  | Male   | 81  |
| Alzheimer's Disease | GSM697329 | Moderate 1031  | Female | 86  |
| Alzheimer's Disease | GSM697330 | Moderate 1037  | Male   | 82  |
| Alzheimer's Disease | GSM697331 | Severe 701     | Male   | 85  |
| Alzheimer's Disease | GSM697332 | Severe 723     | Female | 65  |
| Alzheimer's Disease | GSM697333 | Severe 807     | Male   | 93  |
| Alzheimer's Disease | GSM697334 | Severe 819     | Female | 79  |
| Alzheimer's Disease | GSM697335 | Severe 867     | Female | 94  |
| Alzheimer's Disease | GSM697336 | Severe 872     | Female | 79  |
| Alzheimer's Disease | GSM697337 | Severe 1036    | Female | 93  |

## GSE48350

| Group  | Accession | Title                                     | Organ Region           | Gender | Age |
|--------|-----------|-------------------------------------------|------------------------|--------|-----|
| normal | GSM300338 | EntorhinalCortex_female_82yrs_indiv98     | entorhinal cortex      | female | 82  |
| normal | GSM300339 | Hippocampus_female_82yrs_indiv98          | hippocampus            | female | 82  |
| normal | GSM300340 | PostcentralGyrus_female_82yrs_indiv98     | postcentral gyrus      | female | 82  |
| normal | GSM300341 | SuperiorFrontalGyrus_female_82yrs_indiv98 | superior frontal gyrus | female | 82  |
| normal | GSM300332 | EntorhinalCortex_male_75yrs_indiv96       | entorhinal cortex      | male   | 75  |
| normal | GSM300333 | Hippocampus_male_75yrs_indiv96            | hippocampus            | male   | 75  |
| normal | GSM300335 | SuperiorFrontalGyrus_male_75yrs_indiv96   | superior frontal gyrus | male   | 75  |
| normal | GSM300328 | EntorhinalCortex_female_91yrs_indiv94     | entorhinal cortex      | female | 91  |
| normal | GSM300329 | Hippocampus_female_91yrs_indiv94          | hippocampus            | female | 91  |
| normal | GSM300330 | PostcentralGyrus_female_91yrs_indiv94     | postcentral gyrus      | female | 91  |
| normal | GSM300331 | SuperiorFrontalGyrus_female_91yrs_indiv94 | superior frontal gyrus | female | 91  |
| normal | GSM300324 | EntorhinalCortex_male_69yrs_indiv93       | entorhinal cortex      | male   | 69  |
| normal | GSM300325 | Hippocampus_male_69yrs_indiv93            | hippocampus            | male   | 69  |
| normal | GSM300326 | PostcentralGyrus_male_69yrs_indiv93       | postcentral gyrus      | male   | 69  |
| normal | GSM300327 | SuperiorFrontalGyrus_male_69yrs_indiv93   | superior frontal gyrus | male   | 69  |
| normal | GSM300320 | EntorhinalCortex_female_47yrs_indiv88     | entorhinal cortex      | female | 47  |
| normal | GSM300321 | Hippocampus_female_47yrs_indiv88          | hippocampus            | female | 47  |
| normal | GSM300322 | PostcentralGyrus_female_47yrs_indiv88     | postcentral gyrus      | female | 47  |
| normal | GSM300323 | SuperiorFrontalGyrus_female_47yrs_indiv88 | superior frontal gyrus | female | 47  |
| normal | GSM300316 | EntorhinalCortex_male_45yrs_indiv87       | entorhinal cortex      | male   | 45  |
| normal | GSM300317 | Hippocampus_male_45yrs_indiv87            | hippocampus            | male   | 45  |
| normal | GSM300318 | PostcentralGyrus_male_45yrs_indiv87       | postcentral gyrus      | male   | 45  |
| normal | GSM300319 | SuperiorFrontalGyrus_male_45yrs_indiv87   | superior frontal gyrus | male   | 45  |
| normal | GSM300312 | EntorhinalCortex_male_42yrs_indiv86       | entorhinal cortex      | male   | 42  |
| normal | GSM300313 | Hippocampus_male_42yrs_indiv86            | hippocampus            | male   | 42  |
| normal | GSM300314 | PostcentralGyrus_male_42yrs_indiv86       | postcentral gyrus      | male   | 42  |
| normal | GSM300315 | SuperiorFrontalGyrus_male_42yrs_indiv86   | superior frontal gyrus | male   | 42  |
| normal | GSM300308 | EntorhinalCortex_male_22yrs_indiv85       | entorhinal cortex      | male   | 22  |
| normal | GSM300309 | Hippocampus_male_22yrs_indiv85            | hippocampus            | male   | 22  |
| normal | GSM300310 | PostcentralGyrus_male_22yrs_indiv85       | postcentral gyrus      | male   | 22  |
| normal | GSM300311 | SuperiorFrontalGyrus_male_22yrs_indiv85   | superior frontal gyrus | male   | 22  |
| normal | GSM300304 | EntorhinalCortex_male_33yrs_indiv84       | entorhinal cortex      | male   | 33  |
| normal | GSM300305 | Hippocampus_male_33yrs_indiv84            | hippocampus            | male   | 33  |
| normal | GSM300306 | PostcentralGyrus_male_33yrs_indiv84       | postcentral gyrus      | male   | 33  |
| normal | GSM300307 | SuperiorFrontalGyrus_male_33yrs_indiv84   | superior frontal gyrus | male   | 33  |
| normal | GSM300300 | EntorhinalCortex_male_20yrs_indiv83       | entorhinal cortex      | male   | 20  |

|        |           |                                           |                        |        |    |
|--------|-----------|-------------------------------------------|------------------------|--------|----|
| normal | GSM300301 | Hippocampus_male_20yrs_indiv83            | hippocampus            | male   | 20 |
| normal | GSM300302 | PostcentralGyrus_male_20yrs_indiv83       | postcentral gyrus      | male   | 20 |
| normal | GSM300303 | SuperiorFrontalGyrus_male_20yrs_indiv83   | superior frontal gyrus | male   | 20 |
| normal | GSM300297 | EntorhinalCortex_female_30yrs_indiv82     | entorhinal cortex      | female | 30 |
| normal | GSM300298 | Hippocampus_female_30yrs_indiv82          | hippocampus            | female | 30 |
| normal | GSM300299 | SuperiorFrontalGyrus_female_30yrs_indiv82 | superior frontal gyrus | female | 30 |
| normal | GSM300293 | EntorhinalCortex_female_48yrs_indiv81     | entorhinal cortex      | female | 48 |
| normal | GSM300294 | Hippocampus_female_48yrs_indiv81          | hippocampus            | female | 48 |
| normal | GSM300295 | PostcentralGyrus_female_48yrs_indiv81     | postcentral gyrus      | female | 48 |
| normal | GSM300296 | SuperiorFrontalGyrus_female_48yrs_indiv81 | superior frontal gyrus | female | 48 |
| normal | GSM300289 | EntorhinalCortex_female_44yrs_indiv80     | entorhinal cortex      | female | 44 |
| normal | GSM300290 | Hippocampus_female_44yrs_indiv80          | hippocampus            | female | 44 |
| normal | GSM300291 | PostcentralGyrus_female_44yrs_indiv80     | postcentral gyrus      | female | 44 |
| normal | GSM300292 | SuperiorFrontalGyrus_female_44yrs_indiv80 | superior frontal gyrus | female | 44 |
| normal | GSM300285 | EntorhinalCortex_male_69yrs_indiv8        | entorhinal cortex      | male   | 69 |
| normal | GSM300286 | Hippocampus_male_69yrs_indiv8             | hippocampus            | male   | 69 |
| normal | GSM300287 | PostcentralGyrus_male_69yrs_indiv8        | postcentral gyrus      | male   | 69 |
| normal | GSM300288 | SuperiorFrontalGyrus_male_69yrs_indiv8    | superior frontal gyrus | male   | 69 |
| normal | GSM300283 | PostcentralGyrus_female_36yrs_indiv79     | postcentral gyrus      | female | 36 |
| normal | GSM300284 | SuperiorFrontalGyrus_female_36yrs_indiv79 | superior frontal gyrus | female | 36 |
| normal | GSM300279 | EntorhinalCortex_male_20yrs_indiv78       | entorhinal cortex      | male   | 20 |
| normal | GSM300280 | Hippocampus_male_20yrs_indiv78            | hippocampus            | male   | 20 |
| normal | GSM300281 | PostcentralGyrus_male_20yrs_indiv78       | postcentral gyrus      | male   | 20 |
| normal | GSM300282 | SuperiorFrontalGyrus_male_20yrs_indiv78   | superior frontal gyrus | male   | 20 |
| normal | GSM300275 | EntorhinalCortex_male_20yrs_indiv77       | entorhinal cortex      | male   | 20 |
| normal | GSM300276 | Hippocampus_male_20yrs_indiv77            | hippocampus            | male   | 20 |
| normal | GSM300277 | PostcentralGyrus_male_20yrs_indiv77       | postcentral gyrus      | male   | 20 |
| normal | GSM300278 | SuperiorFrontalGyrus_male_20yrs_indiv77   | superior frontal gyrus | male   | 20 |
| normal | GSM300271 | EntorhinalCortex_female_26yrs_indiv76     | entorhinal cortex      | female | 26 |
| normal | GSM300272 | Hippocampus_female_26yrs_indiv76          | hippocampus            | female | 26 |
| normal | GSM300273 | PostcentralGyrus_female_26yrs_indiv76     | postcentral gyrus      | female | 26 |
| normal | GSM300274 | SuperiorFrontalGyrus_female_26yrs_indiv76 | superior frontal gyrus | female | 26 |
| normal | GSM300267 | EntorhinalCortex_male_86yrs_indiv73       | entorhinal cortex      | male   | 86 |
| normal | GSM300268 | Hippocampus_male_86yrs_indiv73            | hippocampus            | male   | 86 |
| normal | GSM300269 | PostcentralGyrus_male_86yrs_indiv73       | postcentral gyrus      | male   | 86 |
| normal | GSM300270 | SuperiorFrontalGyrus_male_86yrs_indiv73   | superior frontal gyrus | male   | 86 |
| normal | GSM300265 | PostcentralGyrus_male_75yrs_indiv72       | postcentral gyrus      | male   | 75 |
| normal | GSM300266 | SuperiorFrontalGyrus_male_75yrs_indiv72   | superior frontal gyrus | male   | 75 |
| normal | GSM300261 | EntorhinalCortex_male_52yrs_indiv71       | entorhinal cortex      | male   | 52 |
| normal | GSM300262 | Hippocampus_male_52yrs_indiv71            | hippocampus            | male   | 52 |



|        |           |                                           |                        |        |    |
|--------|-----------|-------------------------------------------|------------------------|--------|----|
| normal | GSM300263 | PostcentralGyrus_male_52yrs_indiv71       | postcentral gyrus      | male   | 52 |
| normal | GSM300264 | SuperiorFrontalGyrus_male_52yrs_indiv71   | superior frontal gyrus | male   | 52 |
| normal | GSM300258 | EntorhinalCortex_male_40yrs_indiv68       | entorhinal cortex      | male   | 40 |
| normal | GSM300259 | PostcentralGyrus_male_40yrs_indiv68       | postcentral gyrus      | male   | 40 |
| normal | GSM300260 | SuperiorFrontalGyrus_male_40yrs_indiv68   | superior frontal gyrus | male   | 40 |
| normal | GSM300255 | Hippocampus_male_69yrs_indiv67            | hippocampus            | male   | 69 |
| normal | GSM300256 | PostcentralGyrus_male_69yrs_indiv67       | postcentral gyrus      | male   | 69 |
| normal | GSM300252 | EntorhinalCortex_male_21yrs_indiv66       | entorhinal cortex      | male   | 21 |
| normal | GSM300253 | PostcentralGyrus_male_21yrs_indiv66       | postcentral gyrus      | male   | 21 |
| normal | GSM300254 | SuperiorFrontalGyrus_male_21yrs_indiv66   | superior frontal gyrus | male   | 21 |
| normal | GSM318840 | SuperiorFrontalGyrus_male_66yrs_indiv63   | superior frontal gyrus | male   | 66 |
| normal | GSM300251 | SuperiorFrontalGyrus_female_91yrs_indiv59 | superior frontal gyrus | female | 91 |
| normal | GSM300248 | EntorhinalCortex_female_85yrs_indiv54     | entorhinal cortex      | female | 85 |
| normal | GSM300249 | PostcentralGyrus_female_85yrs_indiv54     | postcentral gyrus      | female | 85 |
| normal | GSM300250 | SuperiorFrontalGyrus_female_85yrs_indiv54 | superior frontal gyrus | female | 85 |
| normal | GSM300246 | PostcentralGyrus_male_70yrs_indiv53       | postcentral gyrus      | male   | 70 |
| normal | GSM300247 | SuperiorFrontalGyrus_male_70yrs_indiv53   | superior frontal gyrus | male   | 70 |
| normal | GSM300242 | EntorhinalCortex_female_64yrs_indiv52     | entorhinal cortex      | female | 64 |
| normal | GSM300243 | Hippocampus_female_64yrs_indiv52          | hippocampus            | female | 64 |
| normal | GSM300244 | PostcentralGyrus_female_64yrs_indiv52     | postcentral gyrus      | female | 64 |
| normal | GSM300245 | SuperiorFrontalGyrus_female_64yrs_indiv52 | superior frontal gyrus | female | 64 |
| normal | GSM300238 | EntorhinalCortex_female_70yrs_indiv47     | entorhinal cortex      | female | 70 |
| normal | GSM300239 | Hippocampus_female_70yrs_indiv47          | hippocampus            | female | 70 |
| normal | GSM300240 | PostcentralGyrus_female_70yrs_indiv47     | postcentral gyrus      | female | 70 |
| normal | GSM300241 | SuperiorFrontalGyrus_female_70yrs_indiv47 | superior frontal gyrus | female | 70 |
| normal | GSM300234 | EntorhinalCortex_male_85yrs_indiv46       | entorhinal cortex      | male   | 85 |
| normal | GSM300235 | Hippocampus_male_85yrs_indiv46            | hippocampus            | male   | 85 |
| normal | GSM300236 | PostcentralGyrus_male_85yrs_indiv46       | postcentral gyrus      | male   | 85 |
| normal | GSM300237 | SuperiorFrontalGyrus_male_85yrs_indiv46   | superior frontal gyrus | male   | 85 |
| normal | GSM300230 | EntorhinalCortex_female_37yrs_indiv45     | entorhinal cortex      | female | 37 |
| normal | GSM300231 | Hippocampus_female_37yrs_indiv45          | hippocampus            | female | 37 |
| normal | GSM300232 | PostcentralGyrus_female_37yrs_indiv45     | postcentral gyrus      | female | 37 |
| normal | GSM300233 | SuperiorFrontalGyrus_female_37yrs_indiv45 | superior frontal gyrus | female | 37 |
| normal | GSM300228 | EntorhinalCortex_female_44yrs_indiv42     | entorhinal cortex      | female | 44 |
| normal | GSM300229 | SuperiorFrontalGyrus_female_44yrs_indiv42 | superior frontal gyrus | female | 44 |
| normal | GSM300227 | Hippocampus_female_91yrs_indiv40-04       | hippocampus            | female | 91 |
| normal | GSM300226 | PostcentralGyrus_female_90yrs_indiv40     | postcentral gyrus      | female | 90 |
| normal | GSM300222 | EntorhinalCortex_female_74yrs_indiv38     | entorhinal cortex      | female | 74 |
| normal | GSM300223 | Hippocampus_female_74yrs_indiv38          | hippocampus            | female | 74 |
| normal | GSM300224 | PostcentralGyrus_female_74yrs_indiv38     | postcentral gyrus      | female | 74 |

|        |           |                                           |                        |        |    |
|--------|-----------|-------------------------------------------|------------------------|--------|----|
| normal | GSM300225 | SuperiorFrontalGyrus_female_74yrs_indiv38 | superior frontal gyrus | female | 74 |
| normal | GSM300218 | EntorhinalCortex_female_34yrs_indiv35     | entorhinal cortex      | female | 34 |
| normal | GSM300219 | Hippocampus_female_34yrs_indiv35          | hippocampus            | female | 34 |
| normal | GSM300220 | PostcentralGyrus_female_34yrs_indiv35     | postcentral gyrus      | female | 34 |
| normal | GSM300221 | SuperiorFrontalGyrus_female_34yrs_indiv35 | superior frontal gyrus | female | 34 |
| normal | GSM300214 | EntorhinalCortex_male_97yrs_indiv34       | entorhinal cortex      | male   | 97 |
| normal | GSM300215 | Hippocampus_male_97yrs_indiv34            | hippocampus            | male   | 97 |
| normal | GSM300216 | PostcentralGyrus_male_97yrs_indiv34       | postcentral gyrus      | male   | 97 |
| normal | GSM300217 | SuperiorFrontalGyrus_male_97yrs_indiv34   | superior frontal gyrus | male   | 97 |
| normal | GSM300212 | PostcentralGyrus_female_74yrs_indiv30     | postcentral gyrus      | female | 74 |
| normal | GSM300213 | SuperiorFrontalGyrus_female_74yrs_indiv30 | superior frontal gyrus | female | 74 |
| normal | GSM300208 | EntorhinalCortex_male_28yrs_indiv29       | entorhinal cortex      | male   | 28 |
| normal | GSM300209 | Hippocampus_male_28yrs_indiv29            | hippocampus            | male   | 28 |
| normal | GSM300210 | PostcentralGyrus_male_28yrs_indiv29       | postcentral gyrus      | male   | 28 |
| normal | GSM300211 | SuperiorFrontalGyrus_male_28yrs_indiv29   | superior frontal gyrus | male   | 28 |
| normal | GSM300204 | EntorhinalCortex_male_83yrs_indiv28       | entorhinal cortex      | male   | 83 |
| normal | GSM300205 | Hippocampus_male_83yrs_indiv28            | hippocampus            | male   | 83 |
| normal | GSM300206 | PostcentralGyrus_male_83yrs_indiv28       | postcentral gyrus      | male   | 83 |
| normal | GSM300207 | SuperiorFrontalGyrus_male_83yrs_indiv28   | superior frontal gyrus | male   | 83 |
| normal | GSM300202 | PostcentralGyrus_female_91yrs_indiv27     | postcentral gyrus      | female | 91 |
| normal | GSM300203 | SuperiorFrontalGyrus_female_91yrs_indiv27 | superior frontal gyrus | female | 91 |
| normal | GSM300200 | PostcentralGyrus_female_92yrs_indiv26     | postcentral gyrus      | female | 92 |
| normal | GSM300201 | SuperiorFrontalGyrus_female_92yrs_indiv26 | superior frontal gyrus | female | 92 |
| normal | GSM300196 | EntorhinalCortex_female_74yrs_indiv21     | entorhinal cortex      | female | 74 |
| normal | GSM300197 | Hippocampus_female_74yrs_indiv21          | hippocampus            | female | 74 |
| normal | GSM300198 | PostcentralGyrus_female_74yrs_indiv21     | postcentral gyrus      | female | 74 |
| normal | GSM300199 | SuperiorFrontalGyrus_female_74yrs_indiv21 | superior frontal gyrus | female | 74 |
| normal | GSM300192 | EntorhinalCortex_female_99yrs_indiv2      | entorhinal cortex      | female | 99 |
| normal | GSM300193 | Hippocampus_female_99yrs_indiv2           | hippocampus            | female | 99 |
| normal | GSM300194 | PostcentralGyrus_female_99yrs_indiv2      | postcentral gyrus      | female | 99 |
| normal | GSM300195 | SuperiorFrontalGyrus_female_99yrs_indiv2  | superior frontal gyrus | female | 99 |
| normal | GSM300189 | EntorhinalCortex_female_74yrs_indiv18     | entorhinal cortex      | female | 74 |
| normal | GSM300190 | Hippocampus_female_74yrs_indiv18          | hippocampus            | female | 74 |
| normal | GSM300191 | SuperiorFrontalGyrus_female_74yrs_indiv18 | superior frontal gyrus | female | 74 |
| normal | GSM300186 | EntorhinalCortex_female_45yrs_indiv17     | entorhinal cortex      | female | 45 |
| normal | GSM300187 | Hippocampus_female_45yrs_indiv17          | hippocampus            | female | 45 |
| normal | GSM300188 | SuperiorFrontalGyrus_female_45yrs_indiv17 | superior frontal gyrus | female | 45 |
| normal | GSM300185 | Hippocampus_male_91yrs_indiv16-07         | hippocampus            | male   | 91 |
| normal | GSM300181 | EntorhinalCortex_male_80yrs_indiv15       | entorhinal cortex      | male   | 80 |
| normal | GSM300182 | Hippocampus_male_80yrs_indiv15            | hippocampus            | male   | 80 |

|                     |            |                                           |                        |        |    |
|---------------------|------------|-------------------------------------------|------------------------|--------|----|
| normal              | GSM300183  | PostcentralGyrus_male_80yrs_indiv15       | postcentral gyrus      | male   | 80 |
| normal              | GSM350078  | SuperiorFrontalGyrus_male_80yrs_indiv15   | superior frontal gyrus | male   | 80 |
| normal              | GSM300177  | EntorhinalCortex_male_95yrs_indiv14       | entorhinal cortex      | male   | 95 |
| normal              | GSM300178  | Hippocampus_male_95yrs_indiv14            | hippocampus            | male   | 95 |
| normal              | GSM300179  | PostcentralGyrus_male_95yrs_indiv14       | postcentral gyrus      | male   | 95 |
| normal              | GSM300180  | SuperiorFrontalGyrus_male_95yrs_indiv14   | superior frontal gyrus | male   | 95 |
| normal              | GSM300173  | EntorhinalCortex_male_45yrs_indiv12       | entorhinal cortex      | male   | 45 |
| normal              | GSM300174  | Hippocampus_male_45yrs_indiv12            | hippocampus            | male   | 45 |
| normal              | GSM300175  | PostcentralGyrus_male_45yrs_indiv12       | postcentral gyrus      | male   | 45 |
| normal              | GSM300176  | SuperiorFrontalGyrus_male_45yrs_indiv12   | superior frontal gyrus | male   | 45 |
| normal              | GSM300172  | Hippocampus_female_82yrs_indiv111         | hippocampus            | female | 82 |
| normal              | GSM300171  | Hippocampus_female_87yrs_indiv109         | hippocampus            | female | 87 |
| normal              | GSM300170  | Hippocampus_male_84yrs_indiv108           | hippocampus            | male   | 84 |
| normal              | GSM300169  | Hippocampus_male_82yrs_indiv106           | hippocampus            | male   | 82 |
| normal              | GSM300168  | Hippocampus_female_96yrs_indiv105         | hippocampus            | female | 96 |
| normal              | GSM300166  | PostcentralGyrus_female_91yrs_indiv10     | postcentral gyrus      | female | 91 |
| normal              | GSM300167  | SuperiorFrontalGyrus_female_91yrs_indiv10 | superior frontal gyrus | female | 91 |
| Alzheimer's Disease | GSM1176196 | entorhinal cortex_female_76_AD_48         | entorhinal cortex      | female | 76 |
| Alzheimer's Disease | GSM1176197 | entorhinal cortex_female_86_AD_15         | entorhinal cortex      | female | 86 |
| Alzheimer's Disease | GSM1176198 | entorhinal cortex_female_82_AD_9          | entorhinal cortex      | female | 82 |
| Alzheimer's Disease | GSM1176199 | entorhinal cortex_female_85_AD_24         | entorhinal cortex      | female | 85 |
| Alzheimer's Disease | GSM1176200 | entorhinal cortex_female_90_AD_36         | entorhinal cortex      | female | 90 |
| Alzheimer's Disease | GSM1176201 | entorhinal cortex_female_90_AD_6          | entorhinal cortex      | female | 90 |
| Alzheimer's Disease | GSM1176202 | entorhinal cortex_female_90_AD_75         | entorhinal cortex      | female | 90 |
| Alzheimer's Disease | GSM1176203 | entorhinal cortex_female_91_AD_11         | entorhinal cortex      | female | 91 |
| Alzheimer's Disease | GSM1176204 | entorhinal cortex_male_76_AD_69           | entorhinal cortex      | male   | 76 |
| Alzheimer's Disease | GSM1176205 | entorhinal cortex_male_85_AD_51           | entorhinal cortex      | male   | 85 |
| Alzheimer's Disease | GSM1176206 | entorhinal cortex_male_85_AD_74           | entorhinal cortex      | male   | 85 |
| Alzheimer's Disease | GSM1176207 | entorhinal cortex_male_86_AD_92           | entorhinal cortex      | male   | 86 |
| Alzheimer's Disease | GSM1176208 | entorhinal cortex_male_87_AD_19           | entorhinal cortex      | male   | 87 |
| Alzheimer's Disease | GSM1176209 | entorhinal cortex_male_94_AD_5            | entorhinal cortex      | male   | 94 |
| Alzheimer's Disease | GSM1176210 | entorhinal cortex_male_94_AD_90           | entorhinal cortex      | male   | 94 |
| Alzheimer's Disease | GSM1176211 | hippocampus_female_60_AD_20               | hippocampus            | female | 60 |
| Alzheimer's Disease | GSM1176212 | hippocampus_female_74_AD_37               | hippocampus            | female | 74 |
| Alzheimer's Disease | GSM1176213 | hippocampus_female_76_AD_48               | hippocampus            | female | 76 |
| Alzheimer's Disease | GSM1176214 | hippocampus_female_79_AD_16               | hippocampus            | female | 79 |
| Alzheimer's Disease | GSM1176215 | hippocampus_female_86_AD_15               | hippocampus            | female | 86 |
| Alzheimer's Disease | GSM1176216 | hippocampus_female_85_AD_24               | hippocampus            | female | 85 |
| Alzheimer's Disease | GSM1176217 | hippocampus_female_90_AD_23               | hippocampus            | female | 90 |
| Alzheimer's Disease | GSM1176218 | hippocampus_female_90_AD_36               | hippocampus            | female | 90 |

|                     |            |                                        |                        |        |    |
|---------------------|------------|----------------------------------------|------------------------|--------|----|
| Alzheimer's Disease | GSM1176219 | hippocampus_female_90_AD_75            | hippocampus            | female | 90 |
| Alzheimer's Disease | GSM1176220 | hippocampus_female_91_AD_11            | hippocampus            | female | 91 |
| Alzheimer's Disease | GSM1176221 | hippocampus_male_76_AD_33              | hippocampus            | male   | 76 |
| Alzheimer's Disease | GSM1176222 | hippocampus_male_76_AD_69              | hippocampus            | male   | 76 |
| Alzheimer's Disease | GSM1176223 | hippocampus_male_79_AD_7               | hippocampus            | male   | 79 |
| Alzheimer's Disease | GSM1176224 | hippocampus_male_80_AD_43              | hippocampus            | male   | 80 |
| Alzheimer's Disease | GSM1176225 | hippocampus_male_85_AD_51              | hippocampus            | male   | 85 |
| Alzheimer's Disease | GSM1176226 | hippocampus_male_86_AD_92              | hippocampus            | male   | 86 |
| Alzheimer's Disease | GSM1176227 | hippocampus_male_87_AD_19              | hippocampus            | male   | 87 |
| Alzheimer's Disease | GSM1176228 | hippocampus_male_94_AD_5               | hippocampus            | male   | 94 |
| Alzheimer's Disease | GSM1176229 | hippocampus_male_94_AD_90              | hippocampus            | male   | 94 |
| Alzheimer's Disease | GSM1176230 | post-central gyrus_female_60_AD_20     | post-central gyrus     | female | 60 |
| Alzheimer's Disease | GSM1176231 | post-central gyrus_female_74_AD_37     | post-central gyrus     | female | 74 |
| Alzheimer's Disease | GSM1176232 | post-central gyrus_female_76_AD_48     | post-central gyrus     | female | 76 |
| Alzheimer's Disease | GSM1176233 | post-central gyrus_female_86_AD_15     | post-central gyrus     | female | 86 |
| Alzheimer's Disease | GSM1176234 | post-central gyrus_female_82_AD_13     | post-central gyrus     | female | 82 |
| Alzheimer's Disease | GSM1176235 | post-central gyrus_female_82_AD_9      | post-central gyrus     | female | 82 |
| Alzheimer's Disease | GSM1176236 | post-central gyrus_female_85_AD_24     | post-central gyrus     | female | 85 |
| Alzheimer's Disease | GSM1176237 | post-central gyrus_female_85_AD_57     | post-central gyrus     | female | 85 |
| Alzheimer's Disease | GSM1176238 | post-central gyrus_female_90_AD_23     | post-central gyrus     | female | 90 |
| Alzheimer's Disease | GSM1176239 | post-central gyrus_female_90_AD_36     | post-central gyrus     | female | 90 |
| Alzheimer's Disease | GSM1176240 | post-central gyrus_female_90_AD_6      | post-central gyrus     | female | 90 |
| Alzheimer's Disease | GSM1176241 | post-central gyrus_female_90_AD_75     | post-central gyrus     | female | 90 |
| Alzheimer's Disease | GSM1176242 | post-central gyrus_female_91_AD_11     | post-central gyrus     | female | 91 |
| Alzheimer's Disease | GSM1176243 | post-central gyrus_female_94_AD_70     | post-central gyrus     | female | 94 |
| Alzheimer's Disease | GSM1176244 | post-central gyrus_female_95_AD_64     | post-central gyrus     | female | 95 |
| Alzheimer's Disease | GSM1176245 | post-central gyrus_male_76_AD_33       | post-central gyrus     | male   | 76 |
| Alzheimer's Disease | GSM1176246 | post-central gyrus_male_76_AD_69       | post-central gyrus     | male   | 76 |
| Alzheimer's Disease | GSM1176247 | post-central gyrus_male_79_AD_7        | post-central gyrus     | male   | 79 |
| Alzheimer's Disease | GSM1176248 | post-central gyrus_male_85_AD_51       | post-central gyrus     | male   | 85 |
| Alzheimer's Disease | GSM1176249 | post-central gyrus_male_85_AD_74       | post-central gyrus     | male   | 85 |
| Alzheimer's Disease | GSM1176250 | post-central gyrus_male_86_AD_92       | post-central gyrus     | male   | 86 |
| Alzheimer's Disease | GSM1176251 | post-central gyrus_male_87_AD_19       | post-central gyrus     | male   | 87 |
| Alzheimer's Disease | GSM1176252 | post-central gyrus_male_94_AD_44       | post-central gyrus     | male   | 94 |
| Alzheimer's Disease | GSM1176253 | post-central gyrus_male_94_AD_5        | post-central gyrus     | male   | 94 |
| Alzheimer's Disease | GSM1176254 | post-central gyrus_male_94_AD_90       | post-central gyrus     | male   | 94 |
| Alzheimer's Disease | GSM1176255 | superior frontal gyrus_female_74_AD_37 | superior frontal gyrus | female | 74 |
| Alzheimer's Disease | GSM1176256 | superior frontal gyrus_female_76_AD_48 | superior frontal gyrus | female | 76 |
| Alzheimer's Disease | GSM1176257 | superior frontal gyrus_female_86_AD_15 | superior frontal gyrus | female | 86 |
| Alzheimer's Disease | GSM1176258 | superior frontal gyrus_female_82_AD_9  | superior frontal gyrus | female | 82 |

|                     |            |                                        |                        |        |    |
|---------------------|------------|----------------------------------------|------------------------|--------|----|
| Alzheimer's Disease | GSM1176259 | superior frontal gyrus_female_85_AD_24 | superior frontal gyrus | female | 85 |
| Alzheimer's Disease | GSM1176260 | superior frontal gyrus_female_85_AD_57 | superior frontal gyrus | female | 85 |
| Alzheimer's Disease | GSM1176261 | superior frontal gyrus_female_88_AD_91 | superior frontal gyrus | female | 88 |
| Alzheimer's Disease | GSM1176262 | superior frontal gyrus_female_90_AD_23 | superior frontal gyrus | female | 90 |
| Alzheimer's Disease | GSM1176263 | superior frontal gyrus_female_90_AD_36 | superior frontal gyrus | female | 90 |
| Alzheimer's Disease | GSM1176264 | superior frontal gyrus_female_90_AD_6  | superior frontal gyrus | female | 90 |
| Alzheimer's Disease | GSM1176265 | superior frontal gyrus_female_90_AD_75 | superior frontal gyrus | female | 90 |
| Alzheimer's Disease | GSM1176266 | superior frontal gyrus_female_91_AD_11 | superior frontal gyrus | female | 91 |
| Alzheimer's Disease | GSM1176267 | superior frontal gyrus_female_94_AD_70 | superior frontal gyrus | female | 94 |
| Alzheimer's Disease | GSM1176268 | superior frontal gyrus_female_95_AD_64 | superior frontal gyrus | female | 95 |
| Alzheimer's Disease | GSM1176269 | superior frontal gyrus_male_76_AD_33   | superior frontal gyrus | male   | 76 |
| Alzheimer's Disease | GSM1176270 | superior frontal gyrus_male_85_AD_51   | superior frontal gyrus | male   | 85 |
| Alzheimer's Disease | GSM1176271 | superior frontal gyrus_male_85_AD_74   | superior frontal gyrus | male   | 85 |
| Alzheimer's Disease | GSM1176272 | superior frontal gyrus_male_86_AD_92   | superior frontal gyrus | male   | 86 |
| Alzheimer's Disease | GSM1176273 | superior frontal gyrus_male_94_AD_44   | superior frontal gyrus | male   | 94 |
| Alzheimer's Disease | GSM1176274 | superior frontal gyrus_male_94_AD_5    | superior frontal gyrus | male   | 94 |
| Alzheimer's Disease | GSM1176275 | superior frontal gyrus_male_94_AD_90   | superior frontal gyrus | male   | 94 |

---
