# Supplementary material for: Integrated analysis and identification of hub genes as novel biomarkers for Alzheimer’s disease
Source: PubMed Central journal article supplement (PMC9468260; doi:10.3389/fnagi.2022.901972), 2022-08-30
Supplement: Data_Sheet_3.pdf [file Data_Sheet_3.pdf]

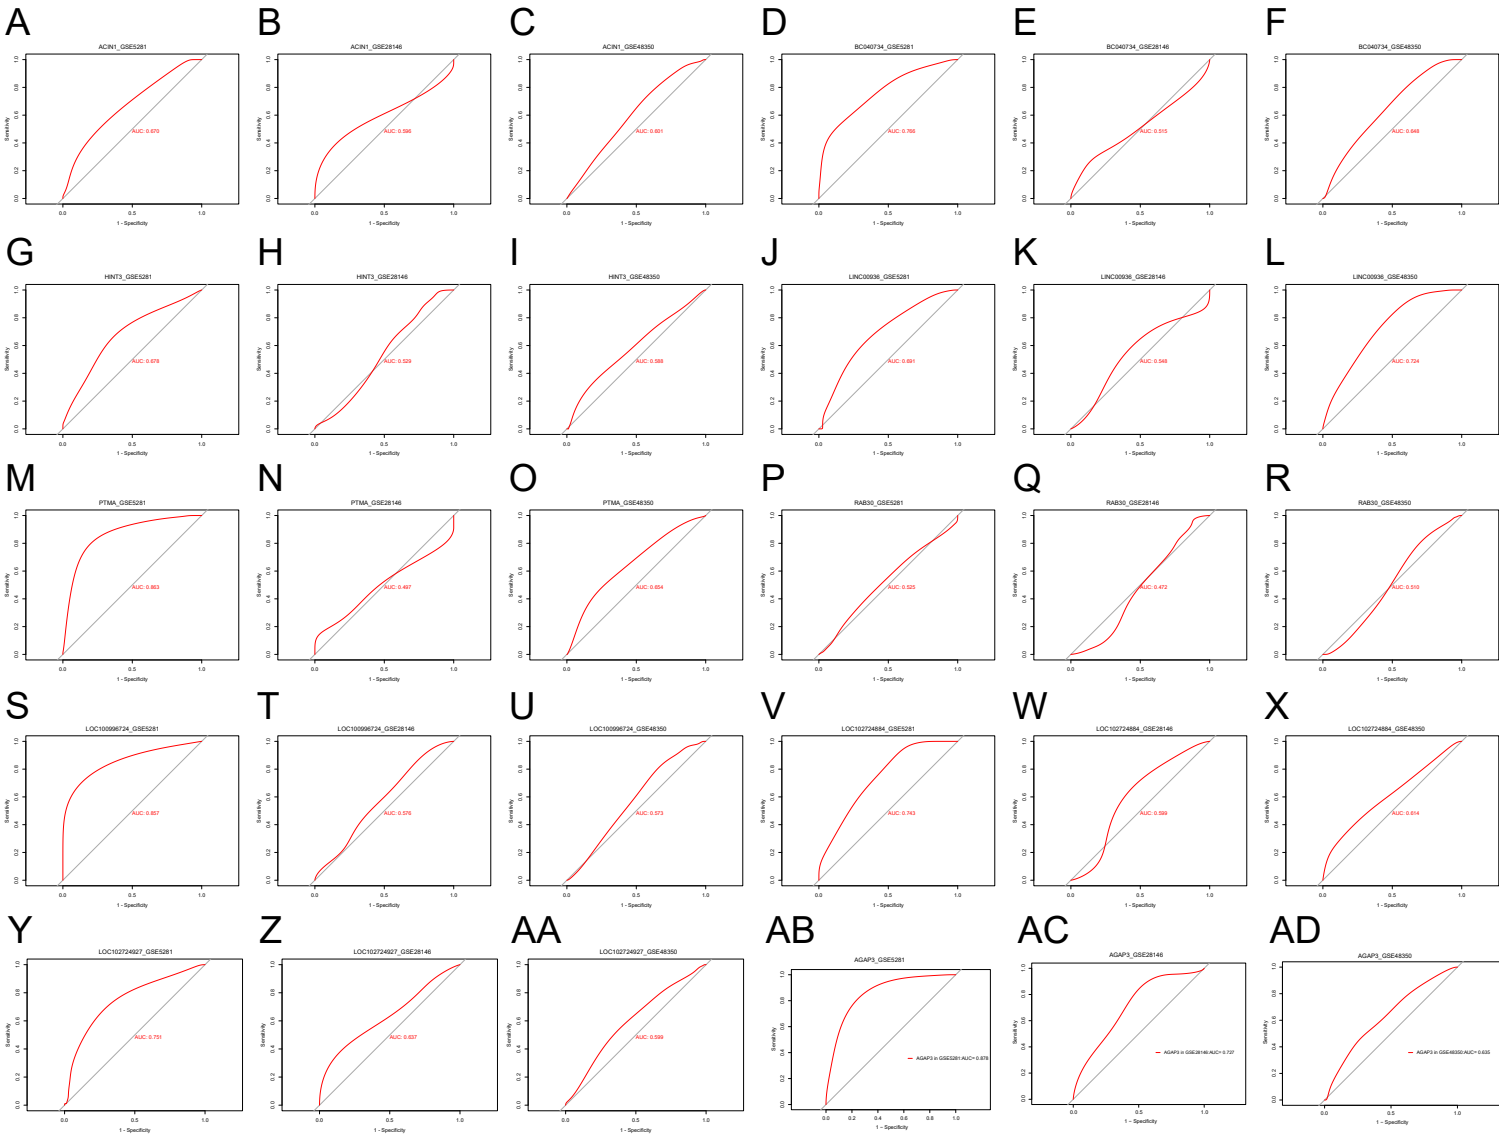

**Figure S1.** The ROC curves of 10 genes in the three datasets. **(A)**. The ROC curve of ACIN1 in GSE5281. **(B)**. The ROC curve of ACIN1 in GSE28146. **(C)**. The ROC curve of ACIN1 in GSE48350. **(D)**. The ROC curve of BC040734 in GSE5281. **(E)**. The ROC curve of BC040734 in GSE28146. **(F)**. The ROC curve of BC040734 in GSE48350. **(G)**. The ROC curve of HINT3 in GSE5281. **(H)**. The ROC curve of HINT3 in GSE28146. **(I)**. The ROC curve of HINT3 in GSE48350. **(J)**. The ROC curve of LINC00936 in GSE5281. **(K)**. The ROC curve of LINC00936 in GSE28146. **(L)**. The ROC curve of LINC00936 in GSE48350. **(M)**. The ROC curve of PTMA in GSE5281. **(N)**. The ROC curve of PTMA in GSE28146. **(O)**. The ROC curve of PTMA in GSE48350. **(P)**. The ROC curve of RAB30 in GSE5281. **(Q)**. The ROC curve of RAB30 in GSE28146. **(R)**. The ROC curve of RAB30 in GSE48350. **(S)**. The ROC curve of LOC100996724 in GSE5281. **(T)**. The ROC curve of LOC100996724 in GSE28146. **(U)**. The ROC curve of LOC100996724 in GSE48350. **(V)**. The ROC curve of LOC102724884 in GSE5281. **(W)**. The ROC curve of LOC102724884 in GSE28146. **(X)**. The ROC curve of LOC102724884 in GSE48350. **(Y)**. The ROC curve of LOC102724927 in GSE5281. **(Z)**. The ROC curve of LOC102724927 in GSE28146. **(AA)**. The ROC curve of LOC102724927 in GSE48350. **(AB)**. The ROC curve of AGAP3 in GSE5281. **(AC)**. The ROC curve of AGAP3 in GSE28146. **(AD)**. The ROC curve of AGAP3 in GSE48350.
